1 **Unveiling *Leishmania* invasion of fibroblasts: calcium signaling, lysosome recruitment**  
2 **and exocytosis culminate with actin-independent invasion.**

3

4 *Short Title: Leishmania amazonensis hijacks host cell lysosomes to actively induce invasion*  
5 *in fibroblasts.*

6

7 Victor Soares Cavalcante-Costa<sup>1</sup>; Mariana Costa-Reginaldo<sup>1</sup>; Thamires Queiroz-Oliveira<sup>1</sup>;  
8 Anny Caroline Silva Oliveira<sup>2</sup>; Natália Fernanda Couto<sup>2</sup>; Danielle Oliveira dos Anjos<sup>3</sup>; Jane  
9 Lima-Santos<sup>3</sup>; Luciana de Oliveira Andrade<sup>2</sup>; Maria Fátima Horta<sup>1</sup> and Thiago Castro-  
10 Gomes<sup>1\*</sup>.

11

12 <sup>1</sup>*Departamento de Bioquímica e Imunologia, <sup>2</sup>Departamento de Morfologia, Instituto de*  
13 *Ciências Biológicas, Universidade Federal de Minas Gerais, 31270-901, Minas Gerais,*  
14 *Brasil.*

15 <sup>3</sup>*Departamento de Ciências Biológicas, Universidade Estadual de Santa Cruz, 45662-900,*  
16 *Bahia, Brasil.*

17

18

19 [victor.soaresce@hotmail.com](mailto:victor.soaresce@hotmail.com) (Victor Soares Cavalcante-Costa); [mariana7100@gmail.com](mailto:mariana7100@gmail.com)  
20 (Mariana Costa-Reginaldo); [thamires.olivv@gmail.com](mailto:thamires.olivv@gmail.com) (Thamires Queiroz-Oliveira);  
21 [ninalarrude@gmail.com](mailto:ninalarrude@gmail.com) (Anny Caroline Silva Oliveira); [naticouto.92@gmail.com](mailto:naticouto.92@gmail.com) (Natália  
22 Fernanda Couto); [doanjos@uesc.br](mailto:doanjos@uesc.br) (Danielle Oliveira dos Anjos); [jlsantos@uesc.br](mailto:jlsantos@uesc.br) (Jane  
23 Lima-Santos); [lucianaandrade@ufmg.br](mailto:lucianaandrade@ufmg.br) (Luciana de Oliveira Andrade); [phorta@icb.ufmg.br](mailto:phorta@icb.ufmg.br)  
24 (Maria Fátima Horta); [thiagocg@gmail.com](mailto:thiagocg@gmail.com) (Thiago Castro-Gomes).

25

26 \*Corresponding author and present address:

27 Departamento de Parasitologia, ICB, UFMG

28 Av. Antônio Carlos, 6627 - Campus Pampulha

29 Belo Horizonte, MG 31270-901, Brazil

30 Phone: +55-31-3409-2969

31 e-mail: Thiago Castro-Gomes : [thiagocg@gmail.com](mailto:thiagocg@gmail.com)

32 **ABSTRACT**

33 Intracellular parasites of the genus *Leishmania* are the causative agents of human  
34 leishmaniasis, a widespread emergent tropical disease. The parasite is transmitted by the bite  
35 of a hematophagous sandfly vector that inoculates motile flagellated promastigote forms into  
36 the dermis of the mammalian host. After inoculation, parasites are ultimately captured by  
37 macrophages and multiply as round-shaped amastigote forms. Macrophages seem not to be  
38 the first infected cells since parasites were observed invading neutrophils first whose  
39 leishmania-containing apoptotic bodies were latter captured by macrophages, thereby  
40 becoming infected. The fact that *Leishmania spp* are able to live and replicate inside immune  
41 phagocytic cells and that macrophages are the main cell type found infected in chronicity  
42 created the perception that *Leishmania spp* are passive players waiting to be captured by  
43 phagocytes. However, several groups have described the infection of non-phagocytic cells *in*  
44 *vivo* and *in vitro*. The objective of this work was to study the cellular mechanisms involved in  
45 the invasion of non-professional phagocytes by *Leishmania*. We show that promastigotes of  
46 *L.amazonensis* actively induces invasion in fibroblasts without cytoskeleton activity, thus by  
47 a mechanism that is distinct from phagocytosis. Inside fibroblasts parasites transformed in  
48 amastigotes, remained viable for at least two weeks and re-transformed in promastigotes when  
49 returned to insect vector conditions. Similarly to what was observed for *T. cruzi*, infection  
50 involves calcium signaling, recruitment and exocytosis of lysosomes involved in plasma  
51 membrane repair and lysosome-triggered endocytosis. Conditions that alter lysosomal  
52 function such as cytochalasin-D and brefeldin-A treatment or the knockout of host cell  
53 lysosomal proteins LAMP-1 and 2 dramatically affected invasion. Likewise, triggering of  
54 lysosomal exocytosis and lysosome-dependent plasma membrane repair by low doses of  
55 streptolysin-O dramatically increased parasite entry. Together our results show that

56 *L.amazonensis* promastigotes are able to take advantage of calcium-dependent lysosomal  
57 exocytosis and lysosome-induced endocytosis to invade and persist in non-phagocytic cells.

58

## 59 **AUTHOR SUMMARY**

60 Intracellular parasites of the genus *Leishmania* are the causative agents of  
61 leishmaniasis. The disease is transmitted by the bite of a sand fly vector which inoculates the  
62 parasite into the skin of mammalian hosts, including humans. During chronic infection the  
63 parasite lives and replicates inside phagocytic cells, notably the macrophages. An interesting  
64 but overlooked finding on *Leishmania* infection is that non-phagocytic cells have also been  
65 found infected by amastigotes. Nevertheless, the mechanisms by which *Leishmania* invades  
66 non-phagocytic cells were not studied to date. Here we show that *L. amazonensis* can actively  
67 induce their own entry into fibroblasts independently of actin cytoskeleton activity, thus by a  
68 mechanism that is distinct from phagocytosis. Invasion involves subversion of host cell  
69 functions such as calcium signaling and recruitment and exocytosis of host cell lysosomes  
70 involved in plasma membrane repair and whose positioning and content interfere in invasion.  
71 Parasites were able to replicate and remained viable in fibroblasts, suggesting that cell  
72 invasion through the mechanism demonstrated here could serve as a parasite hideout and  
73 reservoir, facilitating infection amplification and persistence.

74

75

76

77

78

79

80

## 81 INTRODUCTION

82 The genus *Leishmania* comprises several species of intracellular parasites that cause a  
83 group of diseases collectively known as leishmaniasis. This parasitic infection is typical of  
84 tropical countries and occurs in several regions around the globe, affecting around 14 million  
85 people and generating 1 million new cases each year [1]. The disease is closely linked to  
86 poverty and is associated with malnutrition, population displacement, poor housing,  
87 immunosuppression and lack of financial resources. The outcome of the disease depends on  
88 the species and strain of the parasite and on the immunological and nutritional status of the  
89 patient. The cutaneous form of leishmaniasis is commonly caused by the species *L.*  
90 *braziliensis*, *L. major* and *L. amazonensis*, and is characterized by the formation of skin lesions  
91 that can either heal spontaneously over time or evolve to a chronic condition, which can  
92 disseminate and lead to massive tissue damage. The most severe form of the disease is known  
93 as visceral leishmaniasis, commonly caused by the species *L. donovani* and *L. infantum*, which  
94 affects internal organs such as the spleen and liver and is responsible for the majority of fatal  
95 cases.

96 Evolving a way to cross the host plasma membrane (PM) is a mandatory step for  
97 intracellular pathogens to establish infection. Therefore, a multitude of strategies to penetrate  
98 cells were developed by different microorganisms. Cell invasion can be accomplished through  
99 formation of a moving junction that drives parasites into cells as observed with the protozoans  
100 *Toxoplasma gondii* and *Plasmodium spp.* [2], direct injection of parasites through a  
101 specialized structure that punctures the PM as in microsporidians [3], induction of  
102 phagocytosis as in *Leishmania*, *Listeria*, *Chlamydia* and others [4] or subversion of host cell  
103 endocytic pathways as in *Trypanosoma cruzi* [5]. In the case of *Leishmania spp.*, the parasite  
104 is transmitted by the bite of infected female phlebotomine hematophagous sand flies, which  
105 inject the flagellated infective promastigote forms into the mammalian host during blood

106 meals. Once inside the mammalian host, promastigotes are ultimately captured by  
107 macrophages, which are considered to be their main host cells and in which parasites replicate  
108 as intracellular round-shaped forms, the amastigotes.

109         It has been reported that, before parasites reach macrophages, promastigotes are  
110 phagocytosed by neutrophils, the first immune cells to be recruited to infection site a few  
111 minutes after inoculation into the dermis [6]. Inside neutrophils, and already transformed into  
112 amastigotes, parasites are able to induce the apoptotic death of the host cell whose leishmania-  
113 containing apoptotic bodies are later captured by macrophages, which thereby become  
114 infected [7] [8]. Because in the lesions amastigotes are mainly observed inside macrophages,  
115 these cells are the most studied and the best established infection model. However, cells  
116 unable to perform classical phagocytosis, such as fibroblasts, epithelial and muscle cells, have  
117 been reported to harbor *Leishmania spp.* amastigotes *in vitro* and *in vivo* [9] [10] [11] [12].  
118 Despite its potential importance, the mechanism by which *Leishmania spp.* invade such cells  
119 remains elusive. Therefore, we sought to investigate how the parasite invades cells unable to  
120 perform classical phagocytosis using fibroblasts and *Leishmania amazonensis* promastigotes  
121 as a model. Our results have shown that, *in vitro*, much like the related trypanosomatid  
122 protozoan *T. cruzi*, *L. amazonensis* subverts host cell endocytic pathways, triggering calcium  
123 signaling, lysosome recruitment and exocytosis to induce cell invasion in an actin  
124 cytoskeleton-independent fashion.

125

126

127

128

129

## 130 RESULTS

131 ***L. amazonensis* invades mouse embryonic fibroblasts (MEFs) *in vitro*.** In order to  
132 verify whether *L. amazonensis* was able to invade MEFs, the cells were incubated with *LLa*-  
133 RFP parasites for 1 h and stained with phalloidin-A488 and DAPI. Cells were analyzed by  
134 fluorescence microscopy using Zeiss-Apotome microscope to obtain confocal images. In  
135 figure 1A, a 3D reconstruction including all *z* stacks obtained for an infected cell is shown and  
136 displays the internalized parasite in the fibroblast (all stacks are provided in supplementary  
137 figure S1A). In figure 1B, a single focal plane of the same infected fibroblast shows a parasite  
138 (red) not co-localized with host cell F-actin (green), suggesting that invasion does not depend  
139 on cytoskeleton activity. Parasites were never observed co-localized with F-actin, which  
140 already suggested that cell entry does not need cytoskeleton activity - extra images of infected  
141 cells stained for F-actin are provide in Supplementary Figure S2A. To examine the kinetics of  
142 infection, we quantified infection rate by flow cytometry. Figure 1C shows that as early as 15  
143 min about 18% of cells were RFP-positive. From 30 min to 4 h there were no substantial  
144 changes, but after 24 h, 50% of the cells were infected. Since external parasites can be easily  
145 removed by trypsin treatment, we can assume that RFP-positive cells are the infected cells.

146 To verify whether host cell actin polymerization participates in the process of invasion,  
147 MEFs were pre-treated with cytochalasin D to inhibit actin polymerization, and infection was  
148 assessed. The result (Fig. 1D) shows not only that host cell actin polymerization is dispensable  
149 for cell invasion, but that actin filament disassembly facilitates parasite entry, leading to  
150 almost four-fold increase in the infection rate. In order to determine whether invasion of MEFs  
151 is a unique property of metacyclic promastigotes, cells were incubated with either procyclic  
152 or metacyclic *LLa*-RFP promastigotes (Fig. 1E). We observed that, unlike metacyclic forms,  
153 procyclic promastigotes were not able to infect cells, indicating that the ability to invade MEFs

154 is acquired during metacyclogenesis. To determine whether cell entry depended on the  
155 viability of parasites, MEFs were incubated with PFA-fixed or heat-treated *LLa*. We observed  
156 that, while the infection rate by living parasites reached 18% (4 h) and 56% (24 h), no PFA-  
157 fixed or heat-treated promastigotes were internalized by MEFs, apart from a negligible amount  
158 of heat-treated parasites at 24 h (Fig. 1F and G). This result showed that only living metacyclic  
159 promastigotes are able to enter MEFs.

160 In order to determine whether lysosomes fused with parasite-containing intracellular  
161 compartments, we stained cells with antibodies against the lysosomal protein LAMP-2 and  
162 analyzed cells by fluorescence microscopy. Figure 1H shows a single focal plane of an  
163 infected fibroblast harboring a parasite surrounded by LAMP-2 (green) after 2 h of infection,  
164 demonstrating that the parasites are fully surrounded by a membrane containing the lysosomal  
165 marker LAMP-2. Additional z stacks from this experiment are shown in supplementary figure  
166 S1B.

167 ***L. amazonensis* persists and replicates within LAMP-containing vacuoles inside**  
168 **fibroblasts.** In order to evaluate the fate of the parasites internalized in fibroblasts and their  
169 ability to replicate within the host cell, we analyzed the infected population by flow cytometry  
170 after 4 and 24 h of infection. Our results showed that the RFP mean fluorescence intensity of  
171 the infected population doubled at 24 h post infection, indicating that parasites were able to  
172 replicate inside fibroblasts (Fig. 2A). To evaluate whether parasites persist inside LAMP-  
173 containing vacuoles, we performed an immunofluorescence assay in which cells infected with  
174 *LLa*-RFP were fixed, labeled with anti-LAMP-1 antibody and analyzed after 24 h of infection.  
175 Figures 2B and C show two intracellular parasites with the typical amastigote morphology  
176 inside independent LAMP2-positive vacuoles in the perinuclear region. This result shows that,  
177 upon uptake, *L. amazonensis* survives and is able to differentiate from metacyclic  
178 promastigotes into replicating amastigotes inside vacuoles with properties of lysosomes,

179 similar to what occurs in macrophages. Images obtained by transmission electron microscopy  
180 confirmed the presence of amastigotes within host cell parasitophorous vacuoles (PV) (Figure  
181 2D, white and black asterisks). These images revealed the characteristic  
182 subpellicular microtubules (SM) of *Leishmania* amastigotes and a close juxtaposition between  
183 the parasitophorous vacuole membrane (PVM) and parasite membranes (Fig. 2E and insert).  
184 After a week of infection amastigotes were still observed inside single PVMs (Fig. 2F), and  
185 the parasites showed no detectable alterations in their typical ultrastructural organization, such  
186 as nucleus (N), mitochondria (M) and flagellar pocket (FP) (Fig 2G). After 10 days of  
187 infection we could still observe cells containing viable amastigotes (Fig 2H and I), as  
188 demonstrated by their ability to re-transform into flagellated promastigotes (Fig. 2J) after host  
189 cells were scraped off, inoculated into promastigote culture medium and incubated at 24°C for  
190 a week.

191 ***In vitro* infection of fibroblasts by *L. amazonensis* involves calcium signaling,**  
192 **plasma membrane permeabilization and lysosome recruitment/exocytosis.** Cell invasion  
193 by intracellular parasites often involves calcium signaling, which can induce changes in the  
194 PM that promote parasite entry [13] [14] [15] [16] [5]. In order to evaluate whether *L.*  
195 *amazonensis* metacyclic promastigotes trigger calcium signaling in fibroblasts, we loaded  
196 MEFs with the Fluo-4AM calcium probe before inoculation of *LLa*-RFP and recorded  
197 fluorescence changes during the first 15 min of parasite-host cell contact. Intense intracellular  
198 calcium transients were detected in fibroblasts (Fig. 3A and supplementary video 1), from the  
199 first minute of incubation and continuing throughout the 15 min recorded. Figure 3B shows  
200 quantification over time of the Fluo-4AM fluorescence intensity of each indicated cell,  
201 displayed as a graphic representation of the multiple calcium transients induced in MEFs by  
202 contact with *L. amazonensis* metacyclic promastigotes. To verify whether calcium was  
203 flowing from the extracellular milieu to the cytoplasm through wounds caused by the parasites



204 on the PM, a monolayer of MEFs was incubated with *L. amazonensis* metacyclic  
205 promastigotes in the presence of PI and then analyzed by live fluorescence microscopy. We  
206 saw that, in the presence of parasites, some host cells become PI-positive, showing that *L.*  
207 *amazonensis* promastigotes can induce PM permeabilization (Fig. 3C). When PI was added  
208 only at the end of the infection period and the cell population was analyzed by flow cytometry,  
209 we observed that 18% of the fibroblasts were stained by PI in the absence of calcium (Fig.  
210 3D). On the other hand, no significant PI staining was observed when cells were exposed to  
211 the parasites in the presence of calcium (Fig.3D), indicating that PM permeabilization is  
212 transient and that cells are able to recover when calcium is present. To evaluate whether the  
213 presence of calcium in the extracellular media is important for parasite entry, we performed  
214 the infection assay in the presence of increasing concentrations of calcium. The result (Fig.3E)  
215 shows that while in low calcium medium the infection is poor, the presence of free calcium in  
216 the media favors infection in a dose-dependent manner. Since calcium transients could also  
217 be generated intracellularly by second messengers triggered by the contact with parasites, as  
218 previously shown for *T. cruzi* and other parasites [17], the same experiment (shown in figure  
219 3A) was performed in calcium-free medium. As observed, parasites were able to trigger  
220 calcium signaling even when calcium was absent in the extracellular media (Figs. 3 F and G).  
221 Together these results demonstrate that both intracellular calcium signaling and extracellular  
222 calcium influx occur during contact of *L. amazonensis* promastigotes and host fibroblasts.

223         One of the consequences of calcium rising in the cytosol is the triggering of lysosomal  
224 exocytosis, an important step during the process of PM repair [18]. In the latter, the exocytosis  
225 of lysosomes triggers the internalization of the wounded membrane by endocytosis [19], a  
226 process that may be subverted by endoparasites to invade cells [5]. To assess whether host  
227 cell lysosomes were recruited to parasite binding site, we incubated MEFs with *L.*  
228 *amazonensis*, and permeabilized and labelled the cells to visualize lysosomes. The result (Fig.

229 4A) shows that host cell lysosomes are attracted and polarized towards parasite attachment  
230 site. To verify whether lysosomes were also exocytosing their content upon contact *L.*  
231 *amazonensis*, MEFs were incubated with *LLa*-RFP and then labeled with anti-LAMP-1  
232 antibodies, this time without cell permeabilization. We observed that cells exposed luminal  
233 lysosomal protein epitopes on the extracellular leaflet of the PM (Fig.4B), indicative of  
234 lysosomal exocytosis. Quantification by flow cytometry (Fig. 4C) shows that around 30% of  
235 cells incubated with live parasites exposed LAMP-1 on their surface, an event not triggered  
236 by fixed parasites. Lysosomal exocytosis during cell entry was further confirmed by detecting  
237 beta-Hexosaminidase enzymatic activity (Fig. 4D) and the presence of acid sphingomyelinase  
238 (ASM) and cathepsin-D (Fig. 4E) in culture supernatants during host cell exposure to living  
239 *L. amazonensis* promastigotes. In order to verify whether contact with parasites also enhanced  
240 endocytosis levels in MEFs, cells were labeled with WGA-Alexa-488 to stain the plasma  
241 membrane and incubated with parasites for 15 min. After quenching the remaining  
242 extracellular fluorescence with trypan blue, the endocytosed dye was quantified by flow  
243 cytometry. The result (Fig. 4F) shows that the presence of parasites increases endocytosis in  
244 MEFs, thus making cells more susceptible to invasion.

245         Since exocytosis of lysosomes is followed by a massive endocytosis [20] and generates  
246 ceramide-rich vacuoles [5] in an actin polymerization-independent manner, we decided to  
247 evaluate the presence of lysosomal markers and ceramide in vacuoles of recently internalized  
248 parasites. Cells were then infected with *LLa*-RFP for 1h and labeled with anti-LAMP1 or anti-  
249 ceramide antibodies. As anticipated, parasites were completely surrounded by lysosomal  
250 markers and ceramide and both perfectly delineated bodies and flagella of the internalized  
251 metacyclic promastigotes (Fig. 4G and H). Conversely, and as previously stated, newly  
252 formed parasitophorous vacuoles were never covered by F-actin filaments (Fig. 1B and

253 Supplementary Figure S2A). Together, these results indicated that the invasion process  
254 involves early lysosomal fusion and exocytosis, as previously demonstrated for *T. cruzi* [21].

255 **Invasion of fibroblasts by *L. amazonensis* involves the recruitment of lysosomes**  
256 **to the infection site to form the nascent parasitophorous vacuole.** In order to follow the  
257 recruitment of lysosomes to the parasite entry site, we carried out a time-course infection of  
258 MEFs by *LLa*-RFP, and prepared cells for fluorescence microscopy using anti-LAMP-1  
259 antibodies. At 15 min of infection, we started to observe parasites closely interacting with  
260 fibroblasts and presenting an intense co-localization with LAMP-1 at the flagellar portion  
261 (Fig. 5A). This contact with infective promastigotes creates a lysosomal polarization towards  
262 parasite binding site at the very beginning of invasion process (Fig. 4A, Fig. 5A and  
263 Supplementary Figure S2B). At 30-60 min of interaction, parasites are often observed with  
264 the flagella completely internalized and co-localized with lysosomal proteins whilst parasite  
265 body remains partially unlabeled (Figs. 5B) and surrounded by a LAMP-1-positive pocket. At  
266 90 min, we observed parasites totally internalized, completely covered by the lysosomal  
267 marker and already located at the perinuclear region. At this point, we also started to observe  
268 the shortening of the flagella (Fig 5C). From 120 min (Fig. 5D) to 24 h (Fig. 5E), parasites  
269 were found close to the nuclei inside a juxtaposed oval- or round-shaped vacuole, completely  
270 surrounded by the lysosomal protein and with no detectable flagella, in a typical amastigote  
271 morphology.

272 **Lysosomal positioning and undamaged lysosomes are essential for fibroblast**  
273 **invasion by *L. amazonensis*.** Lysosomes can be pre-linked to the PM at the cell periphery  
274 [22] [23] and associated with microtubules [24]. In order to evaluate the role of microtubule-  
275 based movement of lysosomes in fibroblast invasion by *L. amazonensis*, we treated cells with  
276 the microtubule-blocking agent nocodazole before infection. There was no difference in  
277 invasion between cells treated or not with nocodazole (Fig. 6A), suggesting that PM-

278 associated lysosomes might be sufficient to induce invasion. Cytochalasin D and brefeldin-A  
279 are drugs known to lead to lysosome accumulation at cell periphery [21]. MEFs previously  
280 treated with each of these drugs showed a massive increase in infection (Figs. 6B and C).  
281 However, this increase was markedly blocked by nocodazole treatment (Figs. 6B and C).  
282 Cytochalasin D and brefeldin-A treatment not only led to an increase in infected cells but also  
283 to a higher number of parasites per cell, as we could observe by fluorescence microscopy (Fig.  
284 6D, 6E and 6F) and measure by flow cytometry, which showed about 2-fold increase in mean  
285 fluorescence intensity (not shown).

286 Lysosomes are essential organelles whose exocytosis promotes the removal of PM lesions by  
287 endocytosis. To better evaluate the role of lysosomes in cell infection and specifically address  
288 whether PM repair is important for cell invasion, we performed the infection of LAMP-2  
289 knockout and LAMP-1/2 double knockout MEFs with *LLa*-RFP. These cells are known to be  
290 deficient in PM repair due to the accumulation of cholesterol and caveolin in lysosomes and,  
291 for this reason, are less susceptible to the invasion of *T. cruzi* [25]. The results (Fig. 6G to I)  
292 show that the absence of these lysosomal proteins dramatically impairs *L. amazonensis*  
293 invasion.

294 **Generation of transient PM wounds during parasite-host cell interaction**  
295 **increases invasion.** Lysosome recruitment to cell periphery and lysosomal exocytosis are  
296 events that can be triggered by transient PM disruption. Calcium influx through SLO pores,  
297 for example, leads to calcium-dependent exocytosis of lysosomes, which is followed by a  
298 massive compensatory endocytosis that removes the damaged membrane from cell surface  
299 [19]. Since we observed that parasites were inducing all these processes during cell entry, we  
300 decided to test whether inducing additional PM permeabilization during invasion would result  
301 in higher infection rates. First we established an ideal concentration of SLO to obtain the  
302 maximum PM damage (in the absence of calcium) with total cell recovery (in the presence of

303 calcium) (Fig. 7A). Cells started to become permeabilized (PI-positive) at 50 ng/ml SLO, a  
304 concentration in which almost 100% of the cells were able to repair their PM (PI-negative)  
305 (blue curves). When MEFs were treated with repairable concentrations of SLO during a 15  
306 min of incubation with *L. amazonensis*, infection of the cell population not only doubled (Fig  
307 7B) but the number of parasites/cell also increased, as observed by around a 2-fold increase  
308 in the mean fluorescence intensity of each infected cell for both treatments (not shown). The  
309 massive increase in invasion provoked by SLO-treatment was also visualized when anti-  
310 LAMP-1-labeled infected cells were analyzed by fluorescence microscopy (Fig 7C to E). The  
311 results showed multi-infected cells (Fig 7D) in which parasites also subsequently transformed  
312 into the replicating amastigote forms (Fig. 7E).

## 313 **DISCUSSION**

314 The remarkable ability of *Leishmania spp.* to survive and replicate inside phagocytes,  
315 such as neutrophils, macrophages and dendritic cells, has captured most of the attention and  
316 driven nearly all research in this field during the last decades. However, these parasites are  
317 also able to infect and survive in non-phagocytic cells, a feature already observed by several  
318 authors *in vitro* and *in vivo* [9] [11] [12] [26] (reviewed by Rittig & Bogdan, 2000). In spite  
319 of the importance of such observations, almost no effort has been made to understand how  
320 these parasites succeed in infecting cells that are unable to perform classical phagocytosis.  
321 Here, using MEFs as a model, we show that entry of *L. amazonensis* into fibroblasts is a  
322 process that involves the ability of these parasites to actively induce a cell invasion mechanism  
323 involving transient PM permeabilization, calcium signaling, lysosome recruitment/exocytosis  
324 and lysosome-triggered endocytosis, much like it has been established for another  
325 trypanosomatid, *T. cruzi* [28] [21] [5]. Importantly, we demonstrated that this novel invasion  
326 mechanism by *L. amazonensis* is not a form of induced phagocytosis, since it does not seem  
327 to involve the host cell actin cytoskeleton.

328           While establishing assays for examining infection of MEFs by *L. amazonensis*  
329 promastigotes (Figs. 1A, 1B and 1C), it became evident that these cells could be invaded by  
330 the parasites, and that these parasites were found inside lysosome-derived vacuoles (Fig. 1H)  
331 as observed for macrophages. However, unlike the phagocytosis-mediated entry that occurs  
332 in macrophages, the invasion of MEFs by *L. amazonensis* depends on parasite direct activity,  
333 since PFA-fixed promastigotes and heat-treated parasites were not internalized (Figs. 1F and  
334 1G). The conditions inside MEFs parasitophorous vacuoles not only allowed the typical  
335 differentiation of promastigotes into amastigotes and their replication (Fig. 2A to C), but also  
336 the persistence of viable parasites (Fig. 2H, 2I and 2J), similar to what had been described for  
337 *L. donovani* in human fibroblasts [12].

338           Invasion of several intracellular microorganisms such as *Salmonella typhimurium*  
339 [13], group B streptococci [14], *Listeria monocytogenes* [15] and *T. cruzi* [16] [5] is  
340 accompanied by, or dependent on, a rapid increase in the levels of free intracellular calcium.  
341 In the model described here, contact with live *L. amazonensis* promastigotes also induced  
342 strong intracellular calcium transients in MEFs (Fig. 3A-B and 3F-G). Calcium seems to be  
343 an important requirement for cell invasion, since its increase in the extracellular medium  
344 positively modulated parasite entry (Fig. 3D).

345           We reasoned that one mechanism for the parasites to trigger calcium elevation in the  
346 cytoplasm might be the generation of host cell PM wounds during invasion. Indeed, we  
347 showed that contact with live *L. amazonensis* promastigotes wounds the PM of host cells, and  
348 the lesions are promptly repaired in the presence of calcium (Fig. 3C and 3D). In fact, when  
349 wounded, either by mechanical action or by pore-forming cytolysins, nucleated cells are able  
350 to reseal the PM in a process that involves calcium-dependent exocytosis of lysosomes [18].  
351 Extracellularly-secreted lysosomal enzymes were proposed to act on the extracellular leaflet  
352 of the PM, triggering the removal of the wounded membrane by endocytosis [19] [29].

353 Calcium-dependent exocytosis of lysosomes is followed by a wave of non-conventional  
354 endocytosis [20], which is used by parasites to invade non-phagocytic cells, as previously  
355 shown for *T. cruzi* [5]. Thus, we hypothesized that host cell lysosomes are also essential for  
356 the infection of fibroblasts by *L. amazonensis*. Indeed, during infection of MEFs with *L.*  
357 *amazonensis*, lysosomes were recruited (Fig. 4A, Fig. 5A and Supplementary Figure 2B- 15  
358 and 30 min), fused with host cell PM (Fig. 4B-C) and exocytosed their content in the  
359 extracellular milieu (Fig. 4D-E). The exocytosis of lysosomes triggered by the parasites was  
360 followed by an increase in endocytosis levels in MEFs, indicating that the presence of  
361 parasites induces cell responses that facilitate invasion (Fig. 4F). Interestingly, recruitment of  
362 lysosomes to the infection site was observed since the very beginning of *L. amazonensis*  
363 interaction with MEFs (Fig. 4A, Fig. 5A and Supplementary Figure 2B- 15 and 30 min).  
364 Notably, host cell PM wounding and exocytosis of lysosomes had already been observed even  
365 in macrophages during *Leishmania* uptake by classical phagocytosis [30], indicating that the  
366 mechanism described here might also be important during the invasion of phagocytes.  
367 However, in the case of macrophages, it was proposed that lysosomal fusion would be  
368 important to reseal PM wounds provoked by the movement of parasites after their  
369 internalization [30]. In the case presented here, exocytosis of lysosomes is an event triggered  
370 at early steps of parasite-host cell interaction and culminates with parasite internalization.  
371 Interestingly, in the experiments described here the exocytosis of the lysosomal enzyme beta-  
372 Hex peaked at 15 min of infection (Fig. 4D), matching the early triggering of calcium  
373 transients (Fig. 3A) and the appearance of infected cells as early as 15 min after parasite  
374 inoculation (Fig. 1C). It is known that after exocytosis from lysosomes, ASM cleaves  
375 sphingomyelin on cell surface producing ceramide, a lipid that promotes negative curvature  
376 of the PM enabling endocytosis [19]. A ceramide-rich vacuole, as opposed to actin-rich  
377 vacuole, is precisely what is observed in endosomes derived from the extracellular action of

378 ASM during *T. cruzi* internalization [5]. Also similar to earlier observations, we found that  
379 recently internalized *Leishmania* parasites are surrounded by a tight PV (Fig. 2E-insert),  
380 which is intensely stained by anti-LAMP-1 (Fig. 4G) and anti-ceramide antibodies (Fig. 4H).  
381 This indicates that invasion actually takes advantage of exocytosis of lysosomes, which  
382 provide the membrane that allows parasite entry, in a mechanism that is markedly distinct  
383 from classical parasite internalization by phagocytosis in macrophages. This is corroborated  
384 by the facts that *L. amazonensis* parasites can still invade MEFs pre-treated with cytochalasin-  
385 D (Fig 1D), and that recently internalized parasites do not co-localize with actin filaments  
386 (Fig. 1B and Supplementary Figure S2A). The involvement of lysosomes in the model of  
387 invasion described here was further confirmed by the fact that cytochalasin-D and brefeldin-  
388 A, two drugs that increase infection rates for *T. cruzi* by boosting the number of peripheral  
389 lysosomes, also increased the frequency of *L. amazonensis* infection in MEFs (Fig. 6B and  
390 6C) and the number of parasites per cell, when compared to regular infection conditions (Fig.  
391 6E and 6F). Since both effects could be prevented by nocodazole, a drug that destabilizes  
392 microtubules and stops lysosome traffic to cell periphery [24], we can infer that microtubule-  
393 associated lysosomes may play a role in infection. Interestingly, nocodazole could not prevent  
394 infection by itself, as observed for *T. cruzi* invasion [21], which is probably due to the fact  
395 that mammalian cells already have a portion of their lysosomes pre-bound to the PM, which  
396 could be sufficient to allow parasite invasion [23]. Moreover, LAMP-2 and LAMP-1/2  
397 knockout cells, which have modified lysosomes and impaired PM repair ability [25] were less  
398 susceptible to infection by *L. amazonensis* (Fig. 6H and 6I) when compared to wild type cells  
399 (Fig. 6G), similar to what was observed for *T. cruzi* infection with the same cell lines [25].  
400 Additionally, our results indicate that *Leishmania* promastigotes are able to trigger calcium  
401 signaling in host cells from intracellular stores (Fig. 3F and G) since signaling also occurs in  
402 the absence of extracellular calcium. Further investigation will be needed to identify the



403 molecules involved in this signaling. However, regardless of the origin of the calcium, from  
404 extracellular influx or intracellular reservoirs, the downstream effects important for cell  
405 invasion such as lysosomal exocytosis and its derived endocytosis would be triggered.

406 We still do not know how parasites induce PM injury in MEFs (Fig. 3C-D). However,  
407 at least two possibilities can be raised: 1- parasite movement against the host cell PM could  
408 generate mechanical wounds, as previously proposed for *T. cruzi* [5] and 2- the parasites might  
409 secrete cytolytic molecules leading to PM permeabilization, as proposed for *Listeria*  
410 *monocytogenes* [15]. Since we have described that *Leishmania spp.* produce and secrete pore-  
411 forming cytolysins [31] [32] it is possible that these molecules are responsible for  
412 permeabilizing host cells during invasion. Both possibilities would trigger calcium influx,  
413 induce lysosome exocytosis and trigger endocytosis, playing a key role in promoting parasite  
414 invasion. Indeed, when additional PM wounding was induced in MEFs by adding the pore-  
415 forming protein SLO during *L. amazonensis* invasion, the frequency of infected MEFs  
416 doubled (Fig. 7A and 7B) and multi-infected cells appeared (Fig. 7D). When wounded by  
417 SLO at the concentrations used (Fig. 7A) the host cells were able to reseal their PM, allowing  
418 the intracellular development of amastigote forms (Fig.7E).

419 Although several authors have already reported the presence of *Leishmania spp.*  
420 amastigotes inside non-phagocytic cells *in vivo*, it is well established that, in chronic  
421 leishmaniasis, macrophages are the main cell type found parasitized. However, it has already  
422 been shown that macrophages may not be the primary cells infected at the bite site, as  
423 neutrophils [6] and dendritic cells [33] are found to be infected by promastigotes. This  
424 demonstrates that other cells may also be important to sustain the *Leishmania* life cycle. Given  
425 that the dermis, where parasites are inoculated, is rich in non-phagocytic cells such as  
426 adipocytes, striated muscle cells, epithelial cells and fibroblasts, it is tempting to speculate

427 that promastigotes may actively induce invasion of these cells *in vivo* through the mechanism  
428 described here.

429         Fibroblasts are actually interesting cells to consider during *in vivo Leishmania*  
430 infection, since they are the most abundant cells at the bite site, are major producers of  
431 chemokines that attract neutrophils and macrophages, directly interact with macrophages  
432 during wound healing and have the ability to move and spread through diapedesis [34] [35].  
433 In addition to the ability of *Leishmania* parasites to induce cell wounding and trigger endocytic  
434 repair responses, the phlebotomine vector bite site is known to be an area of intense tissue  
435 damage, largely caused by the vector proboscis that damages the surrounding tissue to  
436 increase blood supply. Thus, at the bite site, *Leishmania* parasites probably encounter several  
437 cell types that are undergoing PM repair, a process known to involve calcium influx,  
438 lysosomal exocytosis, actin cytoskeleton rearrangements and endocytosis of wounded  
439 membranes. Besides providing a safe location to evade innate immunity, the rapid invasion of  
440 non-phagocytic cells shortly after inoculation would allow for a prompt transformation into  
441 amastigote forms, which could be later transferred to macrophages or serve as parasite  
442 reservoir. The invasion process of new macrophages during chronic infection is not yet fully  
443 understood. Amastigotes have been found to be transferred from infected to non-infected cells  
444 without cell rupture, either by phagocytosis of infected apoptotic bodies [6] or by direct cell-  
445 to-cell transfer of parasites [36]. In this context, further investigation is necessary to define  
446 whether active invasion of non-phagocytic cells is an exclusive feature of *Leishmania*  
447 promastigotes, or whether amastigotes are also able to do it. Transfer of amastigotes from an  
448 infected neutrophil to macrophages, known as the Trojan Horse strategy, was proposed to be  
449 a major mechanism allowing *in vivo* invasion of macrophages by *Leishmania spp.* [7]. In this  
450 context, it is possible that not only one, but several cell types could be Trojan Horses in  
451 *Leishmania spp.* infection, notably at the early stages. Since these parasites are able to

452 replicate inside fibroblasts, as we report here (Fig 2A) and as described by others (reviewed  
453 by Rittig and Bogdan, 2000), it is possible that a first round of replication inside these cells  
454 could be an important step leading to infection amplification, prior to macrophage invasion.

455 The ability to actively induce cell invasion characterized here is a neglected feature of  
456 *Leishmania spp*, probably due to the fact that these parasites have been largely perceived as  
457 passive players taken up by phagocytosis. *In vivo* experiments depicting the very first  
458 moments of natural infection are difficult to perform and have focused mainly on neutrophils  
459 and macrophages, not covering all cell types present at the infection site. Our findings  
460 emphasize the importance of performing more accurate and strictly controlled future  
461 investigations for characterizing all cell types harboring intracellular *Leishmania* during the  
462 first moments of natural infections.

## 463 MATERIALS AND METHODS

### 464 1- Parasites and host cells.

465 The PH8 (IFLA/BR/1967/PH8) strain of *Leishmania (Leishmania) amazonensis (LLa)*  
466 used throughout this work was provided by Dr. Maria Norma Melo (Departamento de  
467 Parasitologia, Universidade Federal de Minas Gerais, Belo Horizonte, Brazil). Parasites were  
468 grown at 24°C in Schneider's drosophila medium (Sigma) containing 10% heat-inactivated  
469 (hi) fetal bovine serum (FBS) (GIBCO), 100 U/ml penicillin and 100 µg/ml streptomycin  
470 (GIBCO). *L. amazonensis* expressing Red Fluorescent Protein (*LLa-RFP*) were kindly  
471 provided by Dr. David Sacks (NIH, Bethesda, USA) and cultured as described by Carneiro et  
472 al., 2018. *LLa-RFP* promastigotes were grown as described for wild type (WT) promastigotes  
473 with further addition of 50 µg/ml of geneticin G418 (Life Technologies), for selection of RFP-  
474 expressing parasites. Parasites were cultured for 4-6 days, a period in which cultures become  
475 enriched in infective metacyclic promastigotes. Metacyclic forms used in experiments were

476 separated from procyclic forms using a Ficoll gradient, as described by Späth & Beverley,  
477 2001.

478 Mouse embryonic fibroblasts (MEFs), WT, LAMP-2 knockout and LAMP-1/2 double  
479 knockout cell lines were obtained from from Dr. Paul Saftig's laboratory (Biochemisches  
480 Institut/Christian-Albrechts-Universität Kiel, Germany). Cells were cultured in DMEM  
481 (Gibco) containing 10% hi FBS (GIBCO) at 37°C and 5% CO<sub>2</sub> atmosphere. Cultures were  
482 passaged every 48 h and plated, 24 h before experiments, on culture dishes (Sarstedt) or  
483 directly on glass coverslips, depending on the experiment. Sub-confluent cultures were used  
484 for infection experiments and were analyzed either by fluorescence microscopy or by flow  
485 cytometry. In the experiments described here we used 6 well dishes (Kasvi) and plated cells  
486 24 h prior to experiment at 3 x 10<sup>5</sup> cells per well. For immunofluorescences round coverslips  
487 were placed on the well before cell plating.

## 488 **2- Infection experiments.**

489 Purified *LLa* metacyclic promastigotes were used throughout the experiments, unless  
490 otherwise stated. Parasites were added to dish-adherent MEFs in DMEM containing 10% hi  
491 FBS (GIBCO) which were centrifuged at 500 x g for 10 min at 15°C to synchronize parasite  
492 contact with cell monolayers, followed by incubation at 37°C in a 5% CO<sub>2</sub> atmosphere for the  
493 indicated periods of time. All experiments were performed using a multiplicity of infection of  
494 25 parasites per MEF. For some experiments, parasites were previously fixed in 4% PFA for  
495 15 min, or heat-inactivated for 30 min at 56°C.

## 496 **3- Cell labeling and western blotting.**

497 ***Immunofluorescence and fluorescent probes*** – MEF sub-confluent monolayers were  
498 infected with *LLa*-RFP for the indicated periods of time and fixed with 4% paraformaldehyde.  
499 Preparations were blocked/permeabilized with PBS 2% BSA 0.5% saponin and incubated  
500 with any of the following antibodies or compounds: rat anti-LAMP-1 IgG (1D4B), rat anti-

501 LAMP-2 IgG (ABL-93) (obtained from Developmental Studies Hybridoma Bank), mouse  
502 anti-ceramide IgM (C8104-50TST) (Sigma) or alexa-488-conjugated phalloidin (Life  
503 Technologies). After washing, where appropriate, preparations were incubated for 30 min  
504 with alexa-488-conjugated equivalent secondary antibodies (Life Technologies). All  
505 preparations were stained with DAPI to visualize nuclei. Coverslips were mounted on  
506 microscope slides using anti-fading Prolong-Gold (Life Technologies) and analyzed by  
507 fluorescence microscopy. Images were acquired and analyzed using Q-Capture software or  
508 Zen Software (ZEISS), depending on the experiment, as indicated. In order to evaluate the  
509 exposure of lysosomal epitopes on the PM by flow cytometry (FACS), cells were labeled as  
510 described above but without permeabilization in order to detect only extracellular epitopes.  
511 For this purpose cells were removed from the dish with a cell scraper before analysis by FACS  
512 as described below. **Western blotting** - Samples were prepared with reducing sample buffer,  
513 boiled for 5 min and fractionated by SDS-PAGE on 10% acrylamide gels (BioRad). After  
514 SDS-PAGE, proteins were transferred to a nitrocellulose membrane using a wet transferring  
515 apparatus (BioRad). The membrane was blocked with 5% dry milk, followed by overnight  
516 incubation with 1:500 rabbit anti-acid sphingomyelinase (ASM) IgG (Abcam cat. # ab83354)  
517 or goat anti-cathepsin-D IgG (Santa Cruz sc-6486). After washing, membranes were  
518 incubated with the equivalent secondary antibody conjugated with horseradish peroxidase  
519 (HRP) (BioRad) at 1:10.000 in 5% dry milk for 1 h. After washing, the membrane was treated  
520 with Luminata HRP substrate (Milipore) and analyzed using a LAS-3000 imaging system  
521 (Fuji).

### 522 **3- Quantification and visualization of infection.**

523 **FACS** - To quantify the rate of infections we took advantage of the *LLa*-RFP described  
524 above. After infection experiments, cells were washed, treated with 0.25% trypsin (Gibco) to  
525 detach cells and non-internalized parasites and then immediately analyzed the cell population

526 by flow cytometry using a FACSCAN II (Becton Dickinson). All analyses took into account  
527 10.000 events (MEFs) and were performed using Flow-Jo Software. **Light Microscopy** -  
528 Visualization of infected cells was performed using BX60 Upright Compound Fluorescence  
529 Microscope (Olympus) after staining with a hematoxylin-eosin panoptic stain kit (RenyLab)  
530 and mounting on microscopy slides with Entellan (Merk). Images were obtained using Q-  
531 CapturePro Software. **Fluorescence Microscopy** – Cells labeled with fluorophore-conjugated  
532 antibodies or probes were analyzed with BX60 Upright Compound Fluorescence Microscope  
533 (Olympus) or Axio Imager ApoTome2 Microscope (Zeiss) to obtain confocal images. In order  
534 to acquire single optical sections, *z* stacks were obtained in the ApoTome mode using  
535 structured illumination microscopy technology (SIM). **Transmission Electron Microscopy** -  
536 MEFs infected with *L. amazonensis* promastigotes were fixed in 2.5% glutaraldehyde  
537 (Sigma), 0.1 M sodium cacodylate buffer (pH 7.2) for 1 h at room temperature. Cells were  
538 then washed with 0.1 M sodium cacodylate buffer, collected with a scraper and post-fixed  
539 with a solution of 1% osmium tetroxide (O<sub>5</sub>O<sub>4</sub>) (Sigma), 0.8% potassium ferricyanide and 2.5  
540 mM calcium chloride (CaCl<sub>2</sub>) for 1 h. After this second fixation step cells were washed and  
541 dehydrated in a series ascending concentration of acetone (30-100%). Finally, cells were  
542 embedded in PolyBed resin at a ratio of 1:1 (acetone/resin) for 12 h, pure resin for 14 h, and  
543 polymerized for 72 h at 60°C. Thin sections were obtained with diamond knives in an ultra-  
544 microtome (Leica UC7), collected in copper grids and stained in aqueous solutions of 6%  
545 uranyl acetate and 2% lead citrate for 30 and 5 min, respectively. Samples were observed with  
546 a Tecnai G2-20-SuperTwin FEI-200 kV Transmission Electron Microscope.

#### 547 **4- Evaluation of PM wounding and repair.**

548 The occurrence of PM wounding was evaluated by determining the degree of exclusion  
549 of the impermeant dye propidium iodide (PI), added to cell cultures at 50 µg/mL. PI-treated  
550 cells were analyzed by both fluorescence microscopy (EVOS) and flow cytometry. For

551 fluorescence microscopy experiments using PI, MEFs were plated on 6-well culture dishes  
552 and incubated with parasites in HBBS with or without calcium in the presence of PI. To  
553 quantify PM wounding by flow cytometry PI was added as indicated, cells were detached  
554 from plates with trypsin and analyzed by FACS.

### 555 **5- Calcium-signaling experiments**

556 MEFs ( $1 \times 10^5$  cells per well) were plated in 4-chamber glass bottom dishes and loaded  
557 with the calcium probe Fluo 4 (Invitrogen) according to Luo et al., 2011, with slight  
558 modifications. Briefly, cells were washed twice with DMEM without FBS and incubated for  
559 50 min with Fluo 4-AM loading solution (Invitrogen). Cells were then washed once with  
560 DMEM, 3 times with calcium-free HBSS and maintained in HBSS containing or not 2 mM  
561  $\text{CaCl}_2$ . Calcium transients were recorded by confocal video microscopy (Nikon C2) at 10  
562 frames per second. At 40s of imaging, 5 mM ionomycin (positive control), *LLa*-RFP or HBSS  
563 (negative control) were added to the media and the videos were recorded for up to 15 min.  
564 Image analysis and quantification of fluorescence were performed using Image-J and NIS  
565 Elements (Nikon) software.

### 566 **5- Detection of lysosomal enzymes.**

567 MEF monolayers were incubated with *LLa* in RPMI without phenol red and  
568 supernatants were analyzed for activity of the lysosomal enzyme beta-Hexosaminidase. At the  
569 indicated time points, supernatants were collected, centrifuged to remove detached cells and  
570 beta-Hexosaminidase activity was determined as described by Rodríguez et al., 1997. Briefly,  
571 100  $\mu\text{l}$  of each supernatant were incubated with 100  $\mu\text{l}$  of 2 mM substrate 4-methyl-  
572 umbellyferyl-N-acetyl-b-d-glucosaminide (SIGMA) in 6 mM citrate-phosphate buffer pH 4.5  
573 for 15 min at 37°C. The reaction was stopped with 25  $\mu\text{l}$  of 2 M  $\text{Na}_2\text{CO}_3$ , 1.1 mM glycine and  
574 supernatants were read in a fluorimeter at excitation/emission wavelengths of 365/450 nm,

575 respectively. ASM and cathepsin D were detected by western blotting using anti-ASM or anti-  
576 cathepsin D antibodies, respectively, under reducing conditions and with samples prepared  
577 from FBS-free supernatants after 20 times concentration in a 10 kDa cutoff Amicon®  
578 Centrifugal ultra-filter unit.

## 579 **6- Endocytosis assay**

580 In order to evaluate endocytosis triggered in MEFs by contact with *L. amazonensis*,  
581  $3 \times 10^5$  MEFs were plated in a 6-well dish and the outer leaflet of the PM was labeled with 1  
582  $\mu\text{g/ml}$  Alexa Fluor 488-conjugated wheat germ agglutinin (WGA) (Life Technologies) for 1  
583 min at  $4^\circ\text{C}$ . Cells were then exposed or not to *L. amazonensis* promastigotes at  $37^\circ\text{C}$  for 15  
584 min followed by treatment with 0.2% trypan blue (Sigma-Aldrich) for 2 min to quench the  
585 extracellular fluorescence. After washing, the cell population was removed from the dish by  
586 trypsin treatment and analyzed by FACS to detect the remaining cell-associated fluorescence  
587 corresponding to the endocytosed dye.

## 588 **6- Streptolysin-O (SLO) and Drug Treatments**

589 MEF monolayers were treated with 25, 50 or 100 ng/mL of the pore-forming protein  
590 streptolysin O (SLO) during infection, or 10  $\mu\text{M}$  cytochalasin-D (SIGMA) for 15 min, or 10  
591  $\mu\text{M}$  brefeldin-A for 30 min, or 20  $\mu\text{M}$  nocodazole for 15 min (SIGMA). All drugs were added  
592 before infection and were removed from cells after incubation so as to not interfere with  
593 parasites viability. To evaluate plasma membrane repair triggered by SLO, fibroblasts were  
594 incubated with the indicated concentration of SLO in the absence of calcium (non-repair  
595 condition) or after restoring calcium with 2mM  $\text{CaCl}_2$  (repair condition) – after the addition  
596 of propidium iodide cells were analyzed by FACS.

597



## 598 **7- Repeats**

599           Each experiment in this manuscript was performed in triplicates and the results shown  
600 are representative of at least three biological replicates.

## 601 **ACKNOWLEDGMENTS AND FINANCIAL SUPPORT**

641 We would like to thank Dr. Norma Andrews for reagent donation, advice and critical reading  
642 of this manuscript, Dr. Maria Norma Mello for proofreading this manuscript, Dr. David Sacks  
643 for kindly providing RFP-expressing parasites, Dr. Paul Saftig for kindly providing cell lines,  
644 Elimar Faria for technical support, Jacob Kames and Rodrigo Silva Reston for professional  
645 English proofreading and manuscript editing. We also would like to thank CAPI (Centro de  
646 Aquisição e Processamento de Imagens) for all support with imaging and microscopy and the  
647 Flow Cytometry Laboratory-ICB-UFMG for support with all FACS analysis.

## 648 **REFERENCES**

- 649 1. WHO | Leishmaniasis. WHO. World Health Organization; 2018; Available:  
650 <http://www.who.int/mediacentre/factsheets/fs375/en/>
- 651 2. Besteiro S, Dubremetz J-F, Lebrun M. The moving junction of apicomplexan  
652 parasites: a key structure for invasion. *Cell Microbiol.* 2011;13: 797–805.  
653 doi:10.1111/j.1462-5822.2011.01597.x
- 654 3. Xu Y, Weiss LM. The microsporidian polar tube: A highly specialised invasion  
655 organelle. *Int J Parasitol.* 2005;35: 941–953. doi:10.1016/j.ijpara.2005.04.003
- 656 4. Schille S, Crauwels P, Bohn R, Bagola K, Walther P, van Zandbergen G. LC3-  
657 associated phagocytosis in microbial pathogenesis. *Int J Med Microbiol. Urban &*  
658 *Fischer;* 2018;308: 228–236. doi:10.1016/J.IJMM.2017.10.014
- 659 5. Fernandes MC, Cortez M, Flannery AR, Tam C, Mortara RA, Andrews NW.

- 660 *Trypanosoma cruzi* subverts the sphingomyelinase-mediated plasma membrane  
661 repair pathway for cell invasion. *J Exp Med.* 2011;208: 909–921.  
662 doi:10.1084/jem.20102518
- 663 6. Peters NC, Egen JG, Secundino N, Debrabant A, Kimblin N, Kamhawi S, et al.  
664 In Vivo Imaging Reveals an Essential Role for Neutrophils in Leishmaniasis  
665 Transmitted by Sand Flies. *Science* (80- ). 2008;321: 970–974.  
666 doi:10.1126/science.1159194
- 667 7. Laskay T, van Zandbergen G, Solbach W. Neutrophil granulocytes – Trojan  
668 horses for *Leishmania major* and other intracellular microbes? *Trends Microbiol.*  
669 Elsevier Current Trends; 2003;11: 210–214. doi:10.1016/S0966-842X(03)00075-  
670 1
- 671 8. van Zandbergen G, Solbach W, Laskay T. Apoptosis driven infection.  
672 *Autoimmunity.* 2007;40: 349–52. doi:10.1080/08916930701356960
- 673 9. Bogdan C, Donhauser N, Döring R, Röllinghoff M, Diefenbach A, Rittig MG.  
674 Fibroblasts as host cells in latent leishmaniosis. *J Exp Med.* 2000;191: 2121–30.  
675 Available: <http://www.ncbi.nlm.nih.gov/pubmed/10859337>
- 676 10. Minero MA, Chinchilla M, Guerrero OM, Castro A. [Infection of skin fibroblasts  
677 in animals with different levels of sensitivity to *Leishmania infantum* and  
678 *Leishmania mexicana* (Kinetoplastida: Trypanosomatidae)]. *Rev Biol Trop.*  
679 2004;52: 261–7. Available: <http://www.ncbi.nlm.nih.gov/pubmed/17357424>
- 680 11. Rodríguez JH, Mozos E, Méndez A, Pérez J, Gómez-Villamandos JC.  
681 *Leishmania* Infection of Canine Skin Fibroblasts In Vivo. *Vet Pathol.* 1996;33:  
682 469–473. doi:10.1177/030098589603300423

- 683 12. Schwartzman JD, Pearson RD. The interaction of *Leishmania donovani*  
684 promastigotes and human fibroblasts in vitro. *Am J Trop Med Hyg.* 1985;34:  
685 850–5. Available: <http://www.ncbi.nlm.nih.gov/pubmed/4037177>
- 686 13. Pace J, Hayman MJ, Galán JE. Signal transduction and invasion of epithelial  
687 cells by *S. typhimurium*. *Cell.* 1993;72: 505–14. Available:  
688 <http://www.ncbi.nlm.nih.gov/pubmed/8382566>
- 689 14. Valentin-Weigand P, Jungnitz H, Zock A, Rohde M, Chhatwal GS.  
690 Characterization of group B streptococcal invasion in HEp-2 epithelial cells.  
691 *FEMS Microbiol Lett.* 1997;147: 69–74. Available:  
692 <http://www.ncbi.nlm.nih.gov/pubmed/9037766>
- 693 15. Dramsi S, Cossart P. Listeriolysin O-mediated calcium influx potentiates entry of  
694 *Listeria monocytogenes* into the human Hep-2 epithelial cell line. *Infect Immun.*  
695 2003;71: 3614–8. Available: <http://www.ncbi.nlm.nih.gov/pubmed/12761148>
- 696 16. Schettino PM, Majumder S, Kierszenbaum F. Regulatory effect of the level of  
697 free Ca<sup>2+</sup> of the host cell on the capacity of *Trypanosoma cruzi* to invade and  
698 multiply intracellularly. *J Parasitol.* 1995;81: 597–602. Available:  
699 <http://www.ncbi.nlm.nih.gov/pubmed/7623203>
- 700 17. Tardieux I, Nathanson MH, Andrews NW. Role in host cell invasion of  
701 *Trypanosoma cruzi*-induced cytosolic-free Ca<sup>2+</sup> transients. *J Exp Med.*  
702 1994;179: 1017–22. Available: <http://www.ncbi.nlm.nih.gov/pubmed/8113670>
- 703 18. Reddy A, Caler E V, Andrews NW. Plasma membrane repair is mediated by  
704 Ca<sup>(2+)</sup>-regulated exocytosis of lysosomes. *Cell.* 2001;106: 157–69. Available:  
705 <http://www.ncbi.nlm.nih.gov/pubmed/11511344>

- 706 19. Tam C, Idone V, Devlin C, Fernandes MC, Flannery A, He X, et al. Exocytosis  
707 of acid sphingomyelinase by wounded cells promotes endocytosis and plasma  
708 membrane repair. *J Cell Biol.* 2010;189: 1027–1038. doi:10.1083/jcb.201003053
- 709 20. Idone V, Tam C, Goss JW, Toomre D, Pypaert M, Andrews NW. Repair of  
710 injured plasma membrane by rapid Ca<sup>2+</sup>-dependent endocytosis. *J Cell Biol.*  
711 2008;180: 905–914. doi:10.1083/jcb.200708010
- 712 21. Tardieux I, Webster P, Ravesloot J, Boron W, Lunn JA, Heuser JE, et al.  
713 Lysosome recruitment and fusion are early events required for trypanosome  
714 invasion of mammalian cells. *Cell.* Cell Press; 1992;71: 1117–1130.  
715 doi:10.1016/S0092-8674(05)80061-3
- 716 22. Encarnação M, Espada L, Escrevente C, Mateus D, Ramalho J, Michelet X, et al.  
717 A Rab3a-dependent complex essential for lysosome positioning and plasma  
718 membrane repair. *J Cell Biol.* The Rockefeller University Press; 2016;213: 631–  
719 40. doi:10.1083/jcb.201511093
- 720 23. Hissa B, Pontes B, Roma PMS, Alves AP, Rocha CD, Valverde TM, et al.  
721 Membrane cholesterol removal changes mechanical properties of cells and  
722 induces secretion of a specific pool of lysosomes. *PLoS One.* Public Library of  
723 Science; 2013;8: e82988. doi:10.1371/journal.pone.0082988
- 724 24. Collot M, Louvard D, Singer SJ. Lysosomes are associated with microtubules  
725 and not with intermediate filaments in cultured fibroblasts. *Proc Natl Acad Sci U*  
726 *S A.* National Academy of Sciences; 1984;81: 788–92. Available:  
727 <http://www.ncbi.nlm.nih.gov/pubmed/6366790>
- 728 25. Couto NF, Pedersane D, Rezende L, Dias PP, Corbani TL, Bentini LC, et al.

- 729 LAMP-2 absence interferes with plasma membrane repair and decreases *T. cruzi*  
730 host cell invasion. *PLoS Negl Trop Dis.* 2017;11.  
731 doi:10.1371/journal.pntd.0005657
- 732 26. Holbrook TW, Palczuk NC. Leishmania in the chick embryo. IV. Effects of  
733 embryo age and hatching, and behavior of *L. donovani* in cultures of chick  
734 fibroblasts. *Exp Parasitol.* 1975;37: 398–404. Available:  
735 <http://www.ncbi.nlm.nih.gov/pubmed/1126423>
- 736 27. Rittig MG, Bogdan C. Leishmania-host-cell interaction: complexities and  
737 alternative views. *Parasitol Today.* 2000;16: 292–7. Available:  
738 <http://www.ncbi.nlm.nih.gov/pubmed/10858648>
- 739 28. Rodríguez A, Samoff E, Rioult MG, Chung A, Andrews NW. Host cell invasion  
740 by trypanosomes requires lysosomes and microtubule/kinesin-mediated transport.  
741 *J Cell Biol.* The Rockefeller University Press; 1996;134: 349–62. Available:  
742 <http://www.ncbi.nlm.nih.gov/pubmed/8707821>
- 743 29. Andrews NW, Corrotte M, Castro-Gomes T. Above the fray: Surface remodeling  
744 by secreted lysosomal enzymes leads to endocytosis-mediated plasma membrane  
745 repair. *Semin Cell Dev Biol.* 2015;45: 10–17. doi:10.1016/j.semcdb.2015.09.022
- 746 30. Forestier C-L, Machu C, Loussert C, Pescher P, Späth GF. Imaging host cell-  
747 *Leishmania* interaction dynamics implicates parasite motility, lysosome  
748 recruitment, and host cell wounding in the infection process. *Cell Host Microbe.*  
749 2011;9: 319–30. doi:10.1016/j.chom.2011.03.011
- 750 31. Noronha FS, Cruz JS, Beirão PS, Horta MF. Macrophage damage by *Leishmania*  
751 *amazonensis* cytolyisin: evidence of pore formation on cell membrane. *Infect*

- 752 Immun. 2000;68: 4578–84. Available:  
753 <http://www.ncbi.nlm.nih.gov/pubmed/10899858>
- 754 32. Castro-Gomes T, Almeida-Campos FR, Calzavara-Silva CE, da Silva RA,  
755 Frézard F, Horta MF. Membrane binding requirements for the cytolytic activity  
756 of *Leishmania amazonensis* leishporin. FEBS Lett. 2009;583: 3209–3214.  
757 doi:10.1016/j.febslet.2009.09.005
- 758 33. Bennett CL, Misslitz A, Colledge L, Aebischer T, Blackburn CC. Silent infection  
759 of bone marrow-derived dendritic cells by *Leishmania mexicana* amastigotes. Eur  
760 J Immunol. 2001;31: 876–83. doi:10.1002/1521-  
761 4141(200103)31:3<#60;876::AID-IMMU876>#62;3.0.CO;2-I
- 762 34. Smith RS, Smith TJ, Blieden TM, Phipps RP. Fibroblasts as sentinel cells.  
763 Synthesis of chemokines and regulation of inflammation. Am J Pathol. 1997;151:  
764 317–22. Available: <http://www.ncbi.nlm.nih.gov/pubmed/9250144>
- 765 35. Shaw TJ, Martin P. Wound repair: a showcase for cell plasticity and migration.  
766 Curr Opin Cell Biol. 2016;42: 29–37. doi:10.1016/j.ceb.2016.04.001
- 767 36. Real F, Florentino PTV, Reis LC, Ramos-Sanchez EM, Veras PST, Goto H, et al.  
768 Cell-to-cell transfer of *L. eishmania amazonensis* amastigotes is mediated by  
769 immunomodulatory LAMP-rich parasitophorous extrusions. Cell Microbiol.  
770 2014;16: 1549–1564. doi:10.1111/cmi.12311
- 771 37. Carneiro MBH, Roma EH, Ranson AJ, Doria NA, Debrabant A, Sacks DL, et al.  
772 NOX2-Derived Reactive Oxygen Species Control Inflammation during  
773 *Leishmania amazonensis* Infection by Mediating Infection-Induced Neutrophil  
774 Apoptosis. J Immunol. 2018;200: 196–208. doi:10.4049/jimmunol.1700899

- 775 38. Späth GF, Beverley SM. A Lipophosphoglycan-Independent Method for  
776 Isolation of Infective Leishmania Metacyclic Promastigotes by Density Gradient  
777 Centrifugation. *Exp Parasitol*. Academic Press; 2001;99: 97–103.  
778 doi:10.1006/EXPR.2001.4656
- 779 39. Luo J, Zhu Y, Zhu MX, Hu H. Cell-based calcium assay for medium to high  
780 throughput screening of TRP channel functions using FlexStation 3. *J Vis Exp*.  
781 MyJoVE Corporation; 2011; doi:10.3791/3149
- 782 40. Rodríguez A, Webster P, Ortego J, Andrews NW. Lysosomes Behave as Ca<sup>2+</sup>-  
783 regulated Exocytic Vesicles in Fibroblasts and Epithelial Cells. *J Cell Biol*.  
784 1997;137: 93–104. Available:  
785 <https://www.ncbi.nlm.nih.gov/pmc/articles/PMC2139854/pdf/18982.pdf>

## 786 LEGEND TO FIGURES

787 **Fig 1 – Invasion of MEFs by *L. amazonensis* *in vitro* depends on parasite viability**  
788 **and infectivity and does not require host cell actin polymerization.** (A) MEF infected  
789 by *L. amazonensis*. 3D reconstruction assembled from all z-stacks obtained of an infected  
790 MEF displaying both sides of the infected cell. MEFs were incubated with *LLa*-RFP for  
791 2 h at 37°C, labeled to visualize F-actin (green) and nuclei (blue) and imaged. (B) Single  
792 focal plane of the same infected fibroblast (Fig. 1A) shows the parasite (red) not co-  
793 localized with host cell F-actin (green). (C) Time course of MEF infection by *L.*  
794 *amazonensis*. Infection was performed as described in 1A, at the indicated time points  
795 cells were collected and infection quantified by FACS. Non-infected cells (NI) were gated  
796 as negative controls. (D) *L. amazonensis* infection of MEFs pre-treated with cytochalasin-  
797 D (CD). MEFs were pre-treated (green) or not (red) with 10 μM CD for 15 min, infected  
798 with *LLa*-RFP for 4 h and infection was quantified by FACS. (E) MEF infection by

799 procyclic or metacyclic promastigotes. MEFs were infected with *LLa*-RFP metacyclic  
800 (red) or procyclic (orange) promastigotes. Infection was performed and quantified as  
801 indicated in 1D. (F and G) MEF infection with live, PFA-fixed and heat-killed *LLa*-RFP.  
802 MEFs were incubated with live (red), heat-treated (green) or PFA-fixed (orange) *LLa*-  
803 RFP for 4 (F) or 24 h (G) and infection was quantified by FACS. (H) Infected MEF with  
804 host cell lysosomal staining. Cells were labeled by immunofluorescence to visualize  
805 lysosomes (green), nuclei (blue) and imaged using Axio Imager ApoTome2 Microscope  
806 (Zeiss) to obtain a single focal plane of a MEF infected with *LLa*-RFP (red) after 2 h of  
807 infection.

808 **Fig 2 – *L. amazonensis* resides in tight individual vacuoles rich in lysosomal markers**

809 **and remains viable after differentiation into intracellular stages.** (A) *L. amazonensis*

810 replicates inside MEFs. After infection by *LLa*-RFP, the cell population was analyzed by  
811 FACS at 4 and 24 h post infection. The mean fluorescence intensity (MFI) of the infected  
812 population was calculated and is indicated for each curve. (B and C) *L. amazonensis*  
813 amastigotes residing in perinuclear vacuoles co-localized with lysosomal markers. MEFs  
814 were incubated with *LLa*-RFP for 24 h at 37°C and then labeled to visualize lysosomes  
815 (green) and nuclei (blue) and imaged using BX60 Upright Compound Fluorescence  
816 Microscope (Olympus). The image shows each channel individually and also merged  
817 with (B) or without the bright field (C). (D to G) Transmission electron microscopy  
818 analysis of MEFs infected with *L. amazonensis*. Cells were infected and prepared for  
819 electron microscopy after 4 h (D) or 7 days after infection (F). Asterisks show parasites  
820 inside MEFs. (E and G) Zoom-ins from the region indicated by a black asterisk in D and  
821 F, respectively. Insert in E shows a detail of the parasite PM with its typical subpellicular  
822 microtubules (SM) juxtaposed with the parasitophorous vacuole membrane (PVM). In G  
823 an amastigote is shown within the parasitophorous vacuole (PV) with the flagellar pocket



824 (FP), nuclei (N) and mitochondrion (M). (H and I) Hematoxylin-eosin staining of MEFs  
825 10 days after infection. (J) Promastigotes obtained from MEF-derived amastigotes.  
826 Infected MEFs shown in H and I were scraped, inoculated into insect media and imaged  
827 10 days later by conventional light microscopy.

828 **Fig 3 – Internalization of *L. amazonensis* in MEFs involves calcium influx, PM**  
829 **permeabilization and intracellular calcium signaling.** (A) Visualization of calcium

830 fluxes induced by *L. amazonensis* in MEFs. MEFs were loaded with the calcium-sensitive  
831 probe Fluo-4AM and incubated with *LLa*-RFP. Cells were imaged by live confocal

832 microscopy at 10 frames/s. (B) Graphical representation of intracellular calcium  
833 transients obtained from individual analysis of the 9 indicated cells, from the experiment

834 in 3A. (C) Assessment of host cell PM permeability during *L. amazonensis* infection in

835 MEFs. A MEF monolayer was incubated with *L. amazonensis* in the presence of  
836 propidium iodide (PI). After infection, the cells were examined by fluorescence

837 microscopy. (D) Quantification of cell permeability in MEFs during *L. amazonensis*

838 infection in the presence or absence of calcium. MEFs were incubated with *L.*  
839 *amazonensis* in the presence or absence of calcium for 2 h. PI was added only at the end

840 of the experiment and the cell population was analyzed by FACS. (E) Extracellular

841 calcium favors infection. MEFs were incubated with *LLa*-RFP in increasing

842 concentrations of extracellular calcium for 4 h and infection was quantified by FACS. (F)

843 Detection of parasite-induced intracellular calcium transients in MEFs. MEFs were

844 loaded with the calcium probe Fluo-4AM and incubated with *LLa*-RFP in the absence of

845 extracellular calcium. Cells were imaged by live confocal microscopy at 10 frames/s. (G)

846 Graphical representation of intracellular calcium transients obtained from individual

847 analysis of 7 indicated cells, from the experiment in 3F. The videos used to build figures

848 3A, B, F and G are provided as supplementary data.

849 **Fig 4 – *L. amazonensis* induces lysosomal exocytosis during cell entry in MEFs.** (A)  
850 Lysosomes are recruited to parasite binding site during *L. amazonensis* invasion. MEFs  
851 were incubated with *LLa*-RFP for 30 min, permeabilized and labeled to visualize  
852 lysosomes (green) and nuclei (blue), followed by fluorescence microscopy - white arrows  
853 indicate parasites interacting with the host cell (bright field) and attracting host cell  
854 lysosomes. (B) Same as A but cells were not permeabilized to visualize only the exposure  
855 of lysosomal luminal epitopes on the plasma membrane. (C) Quantification of lysosomal  
856 epitope exposure on the surface of MEFs incubated with live (blue) or PFA-fixed *L.*  
857 *amazonensis* (green) removed from the dish by scraping and analyzed by FACS. (D to E)  
858 Exocytosis of host cell lysosomal enzymes during *L. amazonensis* invasion in MEFs. (C)  
859 The activity of beta-Hex was assayed in supernatants of cells incubated with living (solid  
860 line) and PFA-fixed *L. amazonensis* (dashed line). Controls with *L. amazonensis* alone  
861 were carried out (dotted line). (E) Supernatants were analyzed by western blotting using  
862 anti-ASM or anti-cathepsin D (Cat-D) antibodies. (F) Endocytosis quantification in MEFs  
863 incubated with *LLa*-RFP. MEF PM was labeled with A-488-conjugated WGA before  
864 incubation with parasites for 15 min. After parasite removal the extracellular fluorescence  
865 was quenched by trypan blue and the endocytosed dye was quantified by FACS. (G to H)  
866 Detection of lysosomal markers, ceramide and LAMP recently formed *L. amazonensis*  
867 vacuoles. MEFs were infected with *LLa*-RFP for 1 h and labeled to visualize lysosomes  
868 (green) (G), ceramide (green) (H), DAPI (blue) to stain nuclei, and imaged by  
869 fluorescence microscopy.

870 **Fig 5 – Lysosomes are recruited at early steps of *L. amazonensis* infection in MEFs**  
871 **and envelop parasites as they gradually transform into intracellular amastigotes.**  
872 MEFs were incubated with *LLa*-RFP (red). At indicated time points, infection was  
873 stopped, cells were fixed, labeled to visualize lysosomes (green) and nuclei (blue) and

874 imaged using BX60 Upright Compound Fluorescence Microscope (Olympus). Each  
875 figure shows the three merged channels. (A) Lysosomal recruitment to infection sites.  
876 The white arrow indicates the flagellar region and the red arrow the parasite body. (B) A  
877 partially internalized parasite with the flagella totally surrounded by the lysosomal marker  
878 LAMP-1. (C) Completely internalized parasite located at the perinuclear region  
879 displaying flagellar shortening. (D) Internalized parasite presenting an ovoid form. (E)  
880 Typical amastigote forms within LAMP-1-rich individual vacuoles at the perinuclear  
881 region.

882 **Fig 6 – Host cell lysosome positioning and lysosomal content are crucial for MEF**  
883 **invasion by *L. amazonensis*.** (A) Role of host cell microtubules in the invasion of MEFs  
884 by *L. amazonensis*. MEFs were pre-treated with 20  $\mu$ M nocodazole for 20 min, after drug  
885 removal cells were incubated with *LLa*-RFP for 4 h at 37°C and infection was quantified  
886 by FACS. (B to C) Cytochalasin-D and brefeldin-A treatment potentiates cell invasion in  
887 a microtubule-dependent manner. (B) MEFs were treated (orange) or not (green) with 20  
888  $\mu$ M nocodazole for 20 min prior to treatment with 10  $\mu$ M cytochalasin-D for 15 min.  
889 After drug removal infection was performed as described above and quantified by FACS.  
890 Infection of untreated MEFs by *LLa*-RFP is shown in red. (C) MEFs were treated (orange)  
891 or not (green) with 20  $\mu$ M nocodazole for 20 min prior to treatment with 10  $\mu$ M brefeldin-  
892 A for 30 min. After drug removal infection was performed as described above and  
893 quantified by FACS. Infection of untreated MEFs by *LLa*-RFP is shown in red. (D, E  
894 and F) Multi-infected cells visualized after cytochalasin-D and brefeldin-A treatments.  
895 (D) Non-treated cells, (E) cytochalasin-D pre-treated cells and (F) brefeldin-A pre-treated  
896 cells were infected as described above, fixed, labeled to visualize lysosomes (green) and  
897 nuclei (blue) and imaged using BX60 Upright Compound Fluorescence Microscope  
898 (Olympus). White arrows show internalized parasites. (G to I) Invasion of LAMP-2 and

899 LAMP-1/2 knockout MEFs by *L. amazonensis*. (G) WT (H) LAMP-2 knockout and (I)  
900 LAMP-1/2 double knockout MEFs were infected by *LLa*-RFP as described above and  
901 infection was quantified by FACS.

902 **Fig 7 – Transient PM permeabilization enhances MEF invasion by *L. amazonensis*.**

903 (A) MEFs undergo PM repair in the presence of calcium. MEFs were incubated with  
904 increasing concentrations of the pore forming protein streptolysin-O (SLO) at 37°C for  
905 15 min in the presence or absence of calcium. After the addition of PI the cell population  
906 was analyzed by FACS. The percentages of cell wounding (red) and cells that underwent  
907 PM repair (blue) are indicated in each graph. PM repair is indicated as the percentage of  
908 cells that excluded PI after being wounded by SLO. (B) Effect of SLO-triggered PM  
909 permeabilization in the invasion of MEFs by *L. amazonensis*. MEFs were incubated with  
910 *LLa*-RFP for 4 h. At 15 min of infection SLO was inoculated in the media at the indicated  
911 concentrations and infection was quantified by FACS. Infection of non-treated (red) and  
912 SLO-treated cells (green) is shown. The percentage of infection is indicated for each  
913 curve. (C to E) MEFs multi-infected by *L. amazonensis* after SLO-treatment. The  
914 experiment showed in 7B was carried out using 50 ng/mL SLO and cells were labeled to  
915 visualize lysosomes (green) and nuclei (blue) after 4 (C and D) or 24 h (E) of infection,  
916 and imaged using BX60 Upright Compound Fluorescence Microscope (Olympus). White  
917 arrows show internalized parasites.

918 **Supplementary Fig S1 – (A and B) Series of optical sections of MEFs infected by *L.***  
919 *amazonensis* shown in Fig 1.A-B and Fig 1H. MEFs were incubated with *LLa*-RFP for 2  
920 h at 37°C, labeled to visualize (A) F-actin (green) or (B) lysosomes (green) and nuclei  
921 (blue). Cells were imaged by Axio Imager ApoTome2 Microscope (Zeiss) to obtain  
922 confocal images. Z-stacks were obtained using structured illumination microscopy  
923 technology (SIM).

924 **Supplementary Fig S2 – Recently internalized parasites do not co-localize with F-**  
925 **actin, attracts lysosomes to infection site and are covered by lysosomal proteins as**  
926 **they enter cells.** MEFs were incubated with *LLa*-RFP (red). At indicated time points,  
927 infection was stopped, cells were fixed, labeled to visualize lysosomes (green) and nuclei  
928 (blue) and imaged using BX60 Upright Compound Fluorescence Microscope (Olympus).  
929 Each figure shows the three merged channels. (A) Three different fields showing cells  
930 containing recently internalized parasites (white arrows) and without actin coating. (B)  
931 Lysosomes are recruited to infection site and enwrap parasites during cell invasion.  
932 Parasites normally undergo transformation into amastigote forms.

933 **Supplementary Video 1 –** To visualize calcium fluxes induced by *L. amazonensis* MEFs  
934 were loaded with the calcium probe Fluo-4AM and incubated with *LLa*-RFP in the  
935 presence of 2 mM CaCl<sub>2</sub>. Cells were imaged for 15 min in a Nikon C2 confocal  
936 microscope at 10 frames/s.

937 **Supplementary Video 2 –** To visualize calcium transients generated intracellularly by *L.*  
938 *amazonensis* MEFs were loaded with the calcium probe Fluo-4AM and incubated with  
939 *LLa*-RFP in calcium-free medium. Cells were imaged for 15 min in a Nikon C2 confocal  
940 microscope at 10 frames/s.

# FIGURE 1

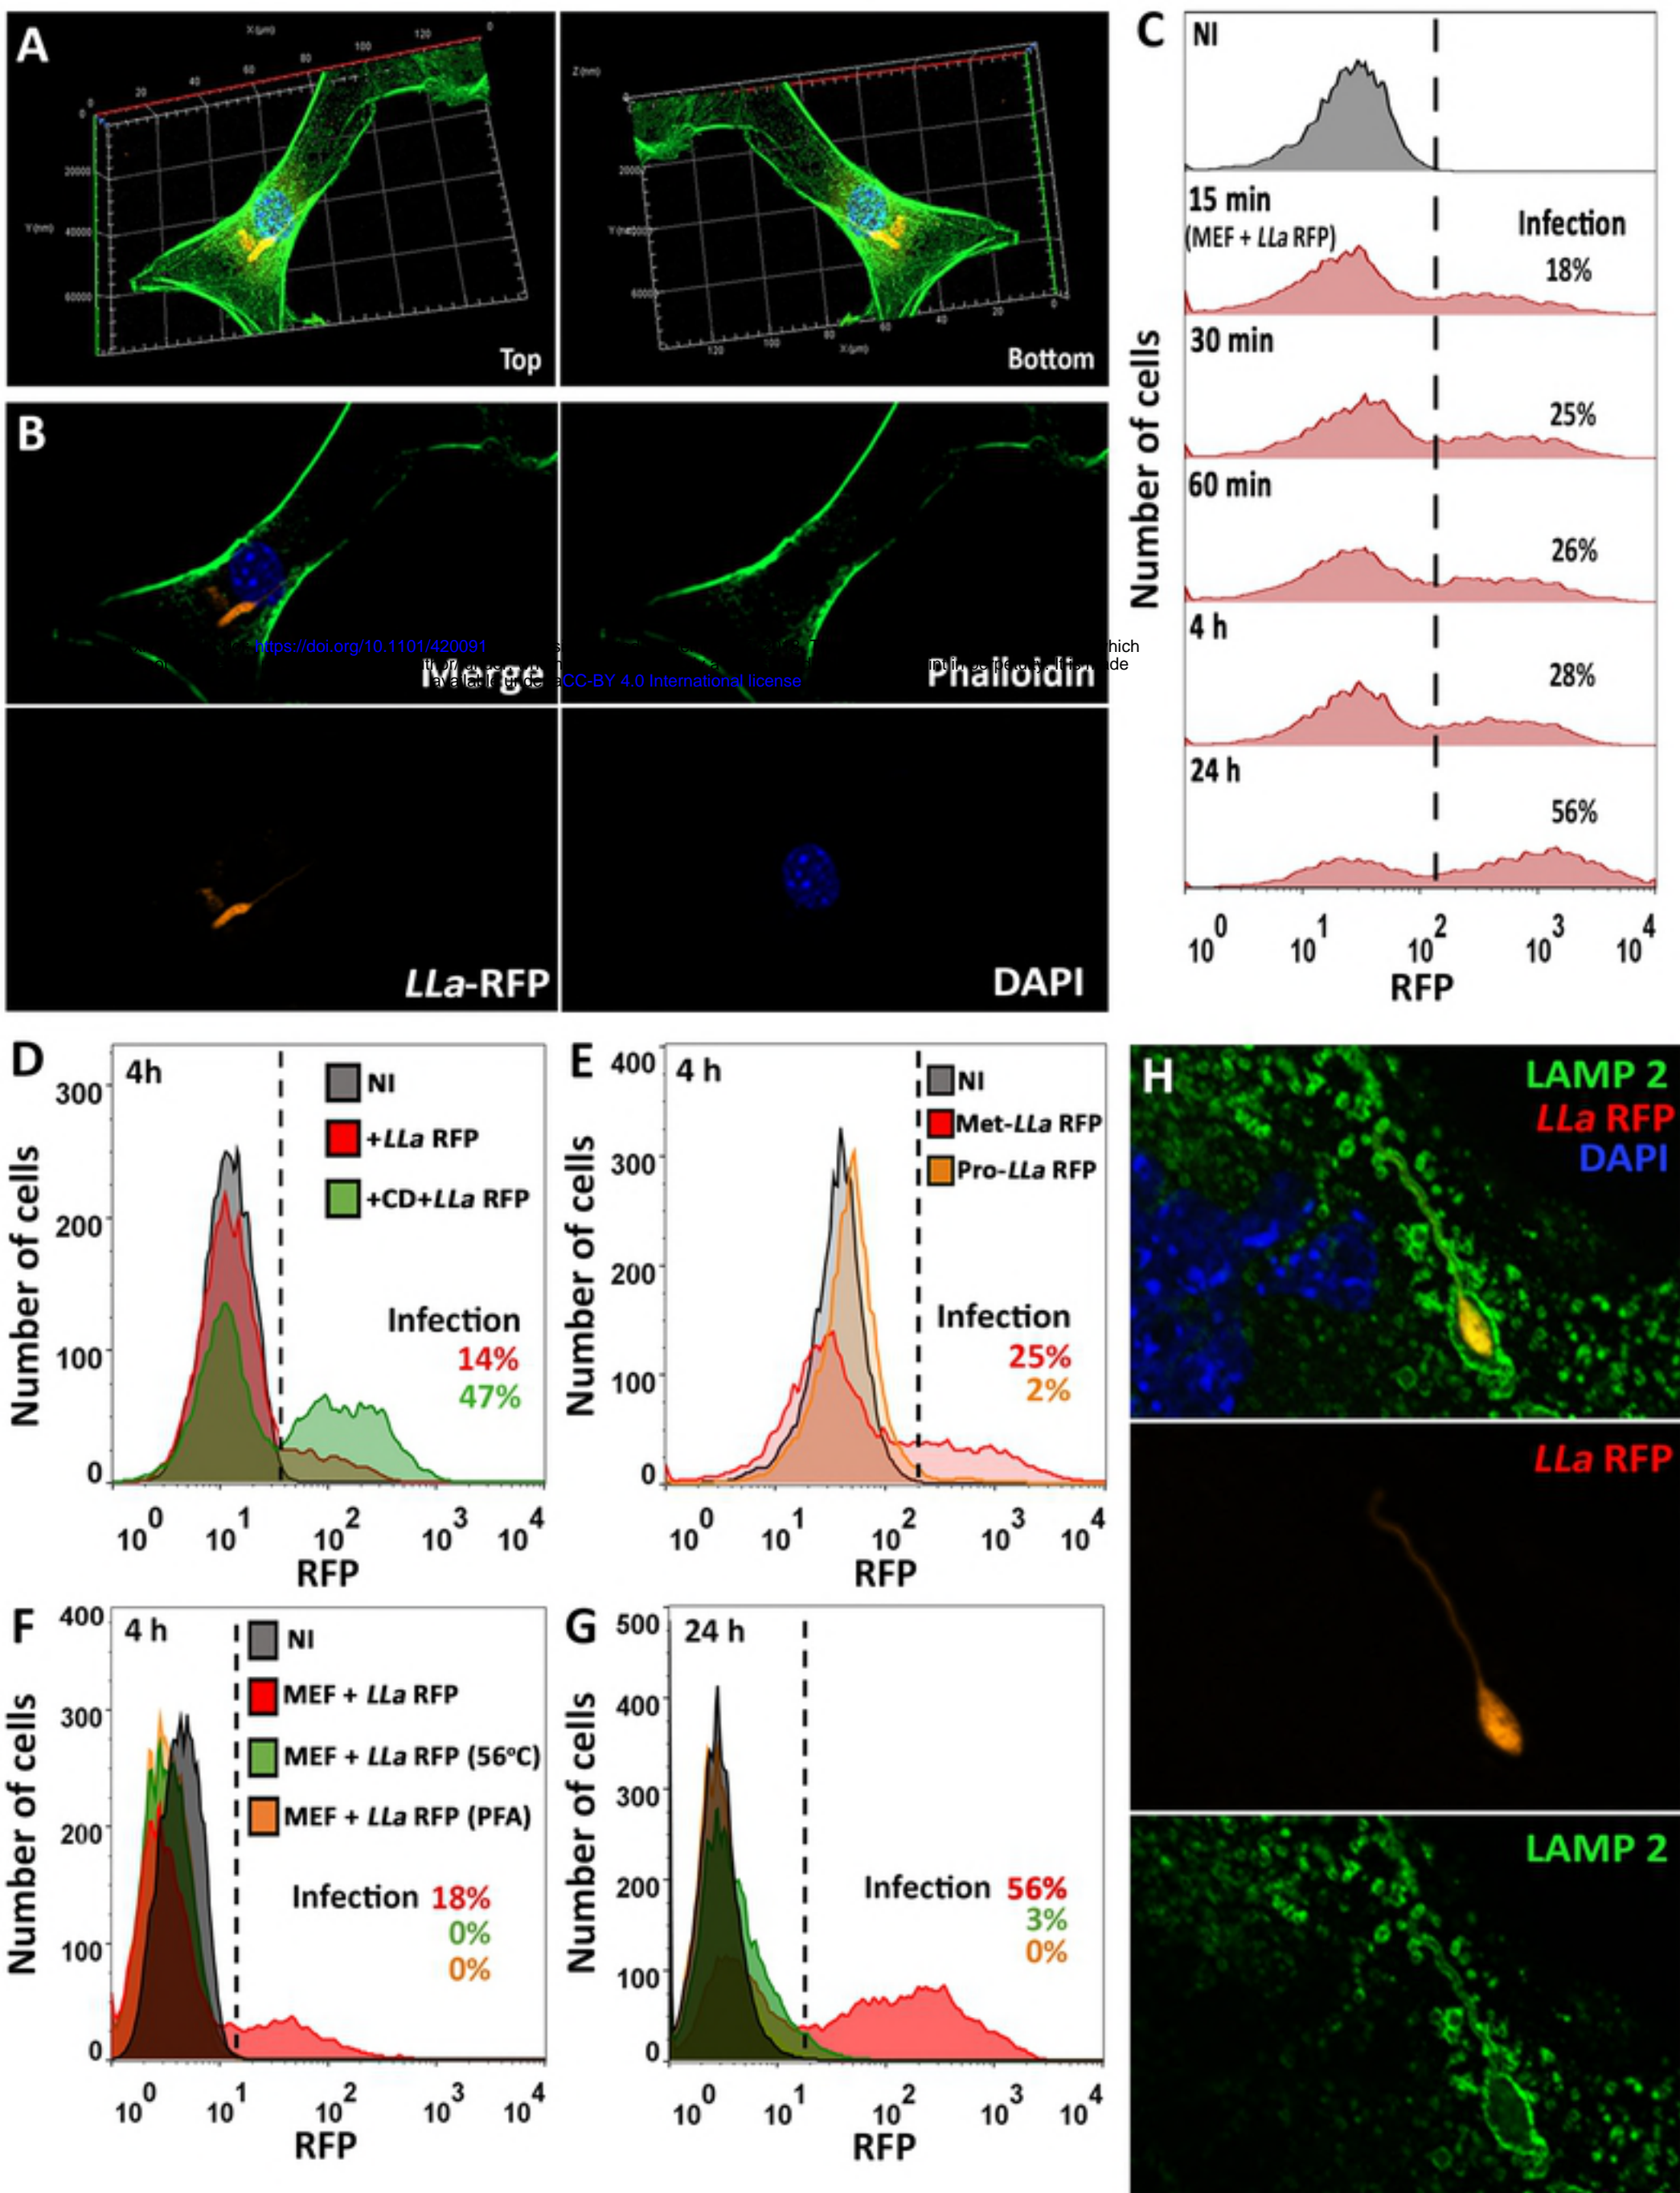

# FIGURE 2

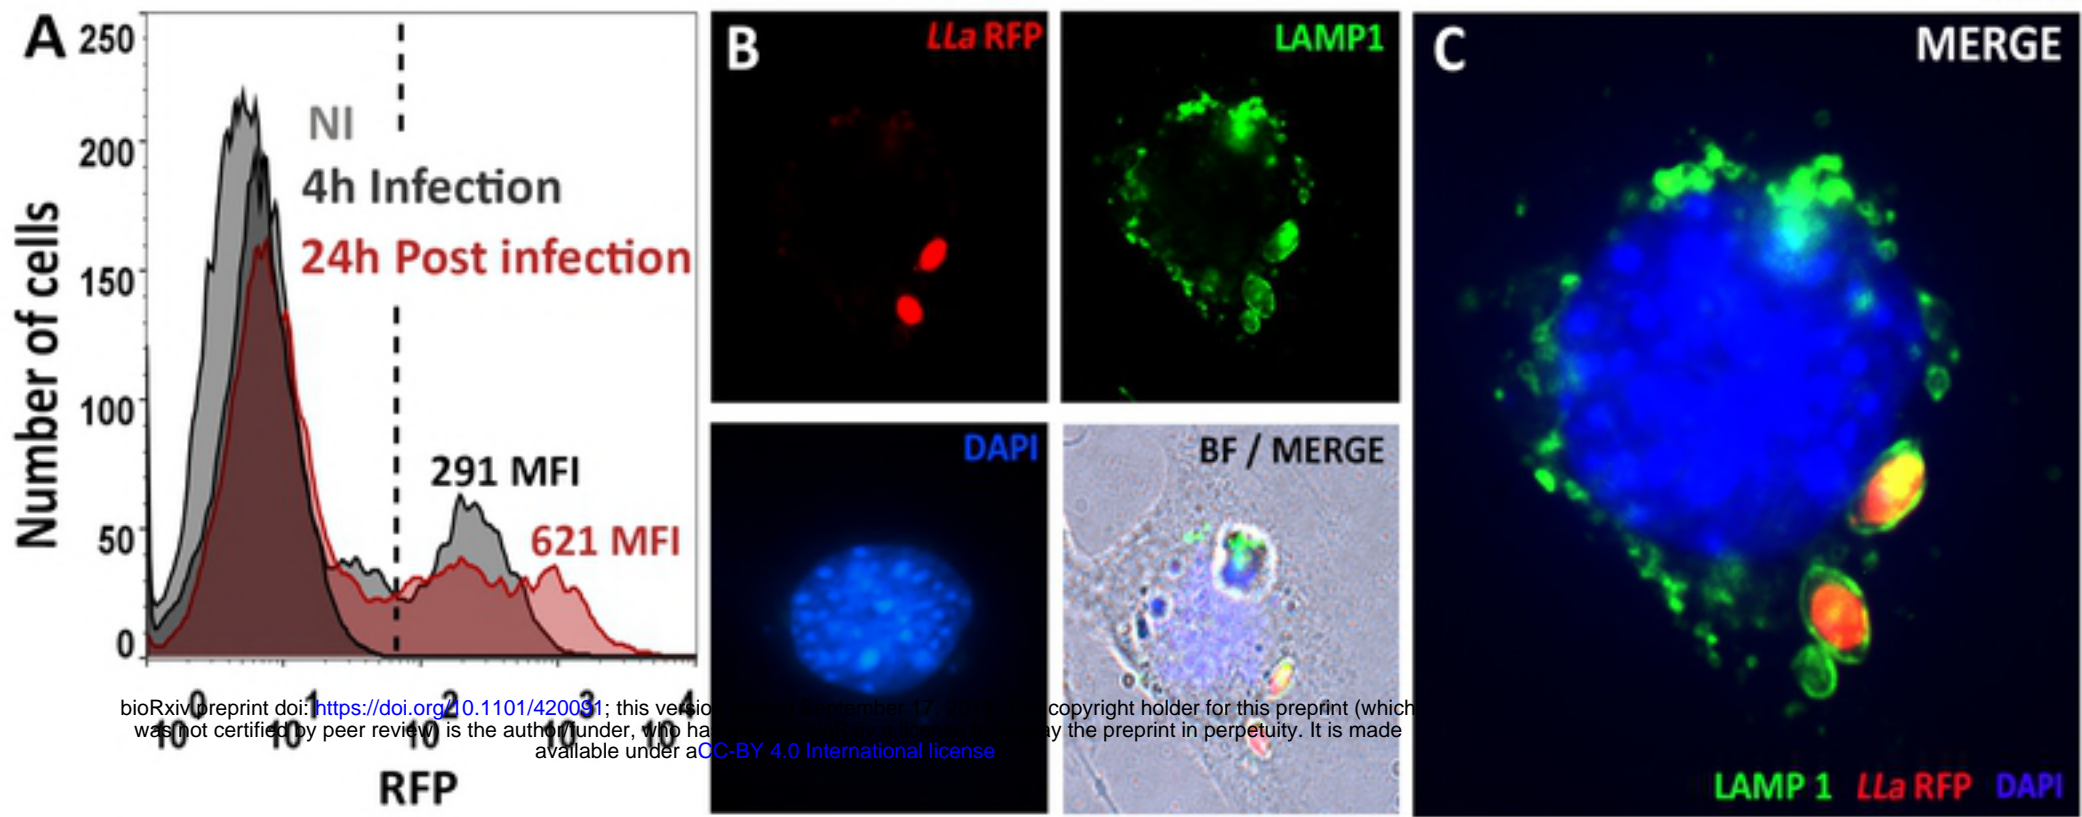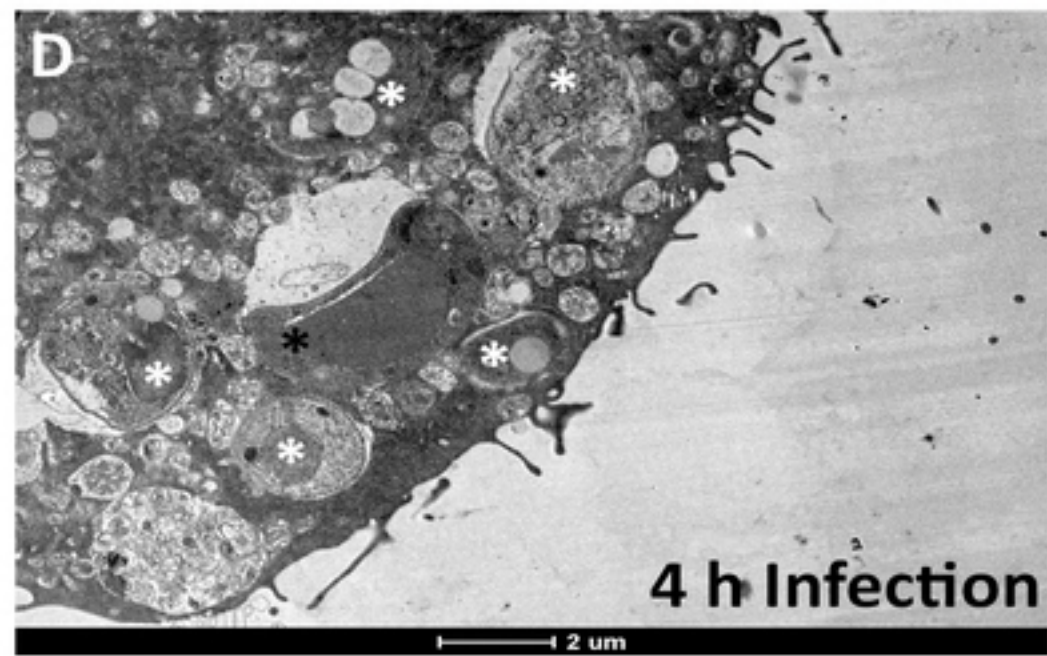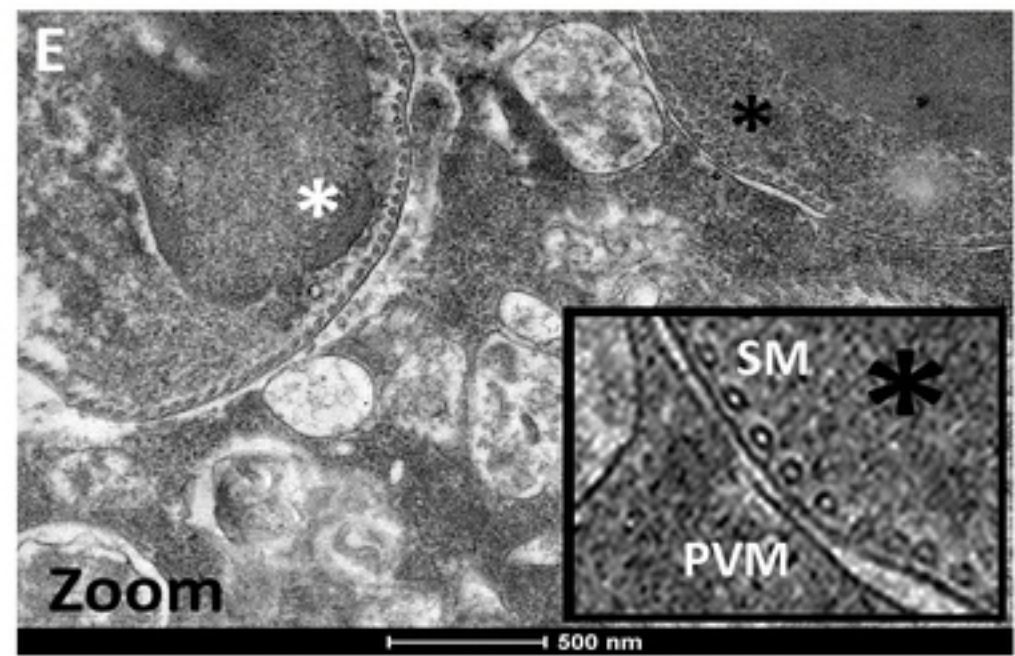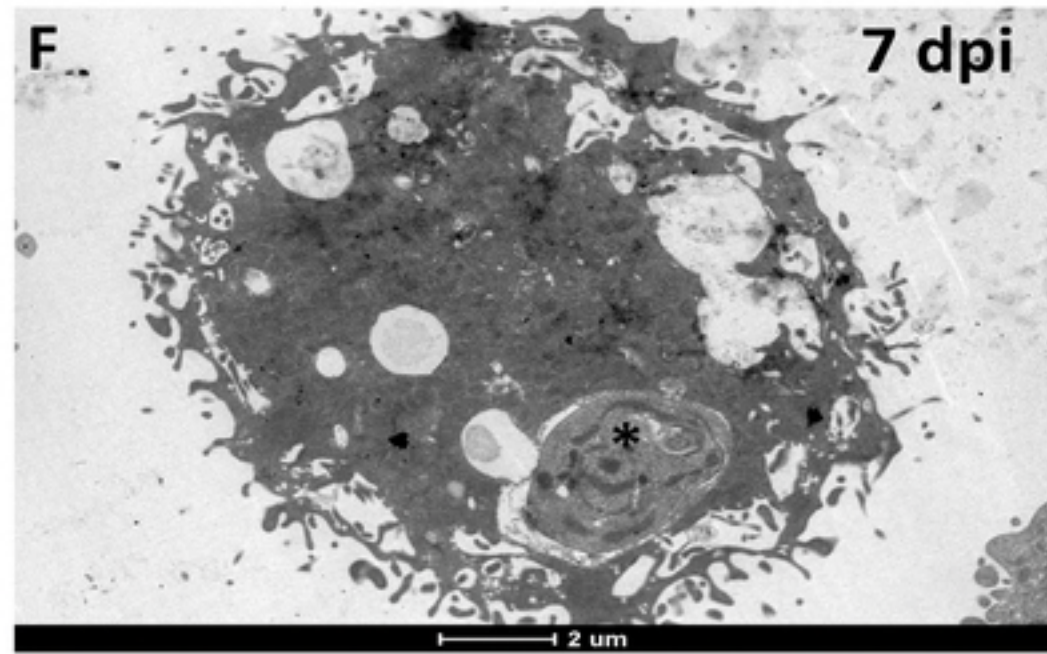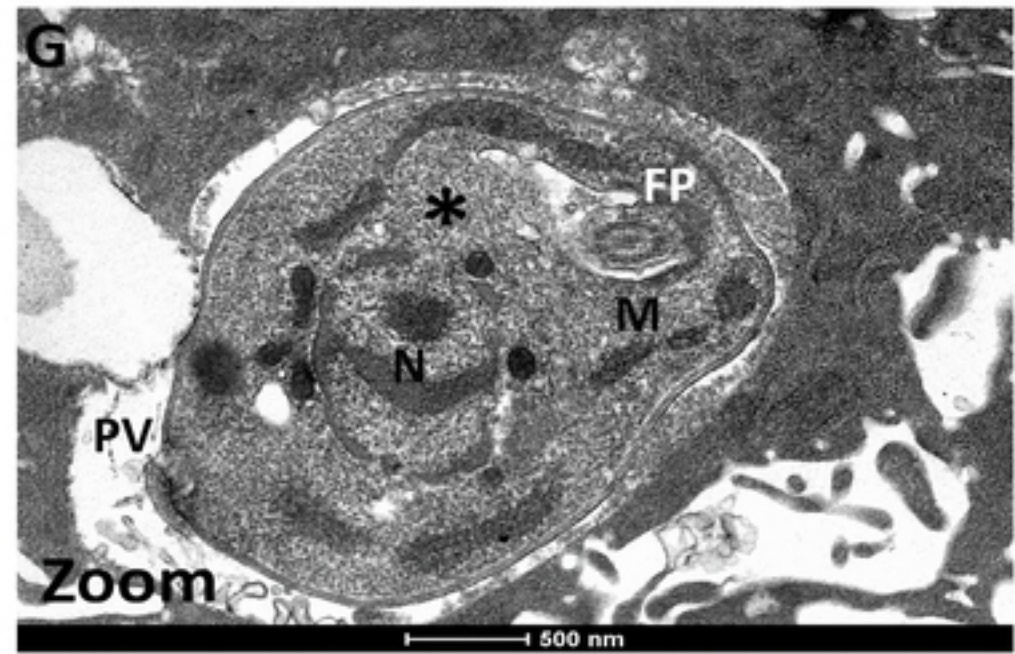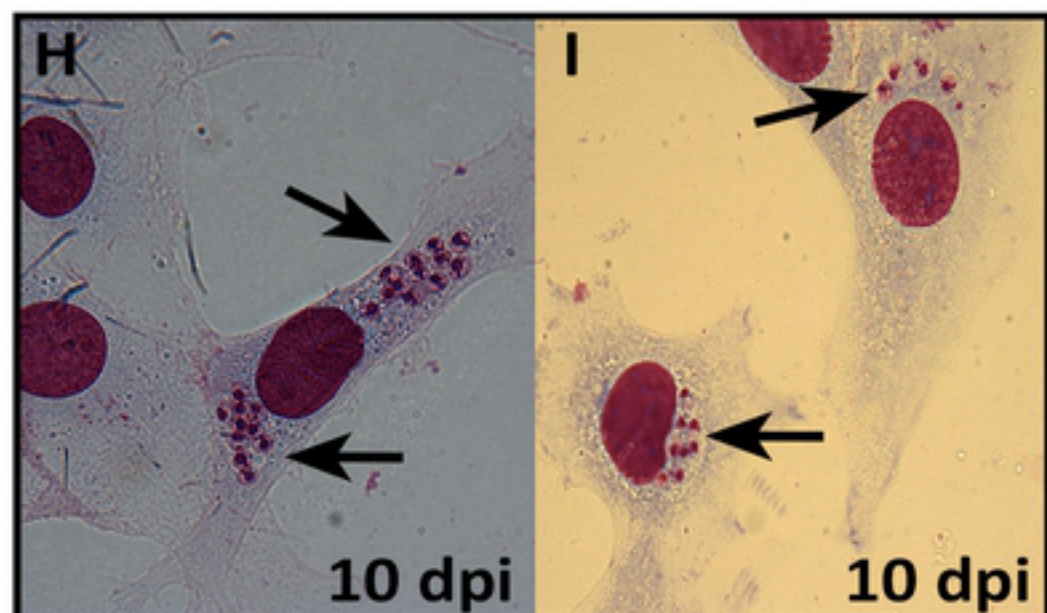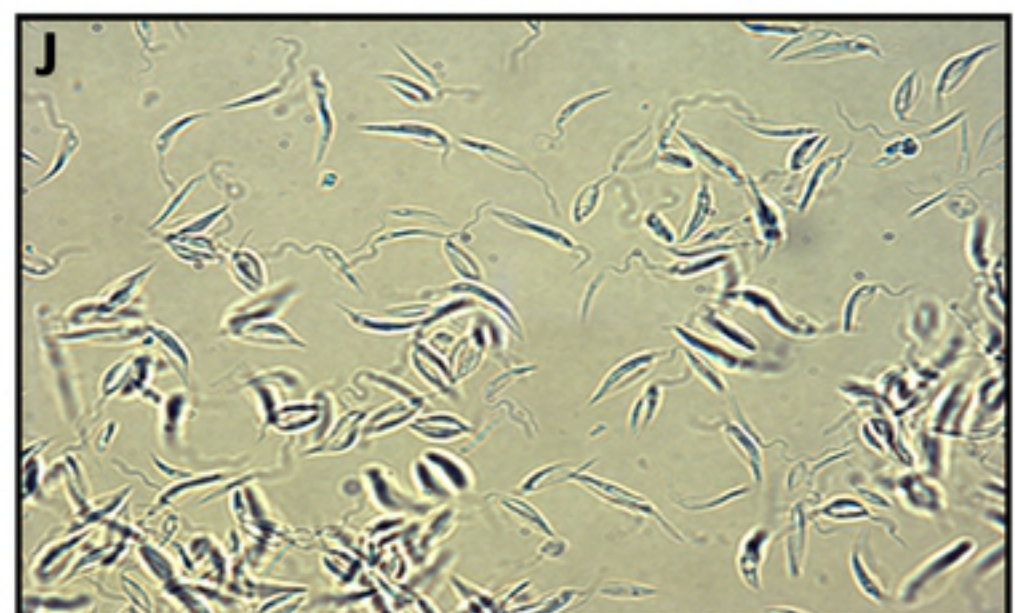

# FIGURE 3

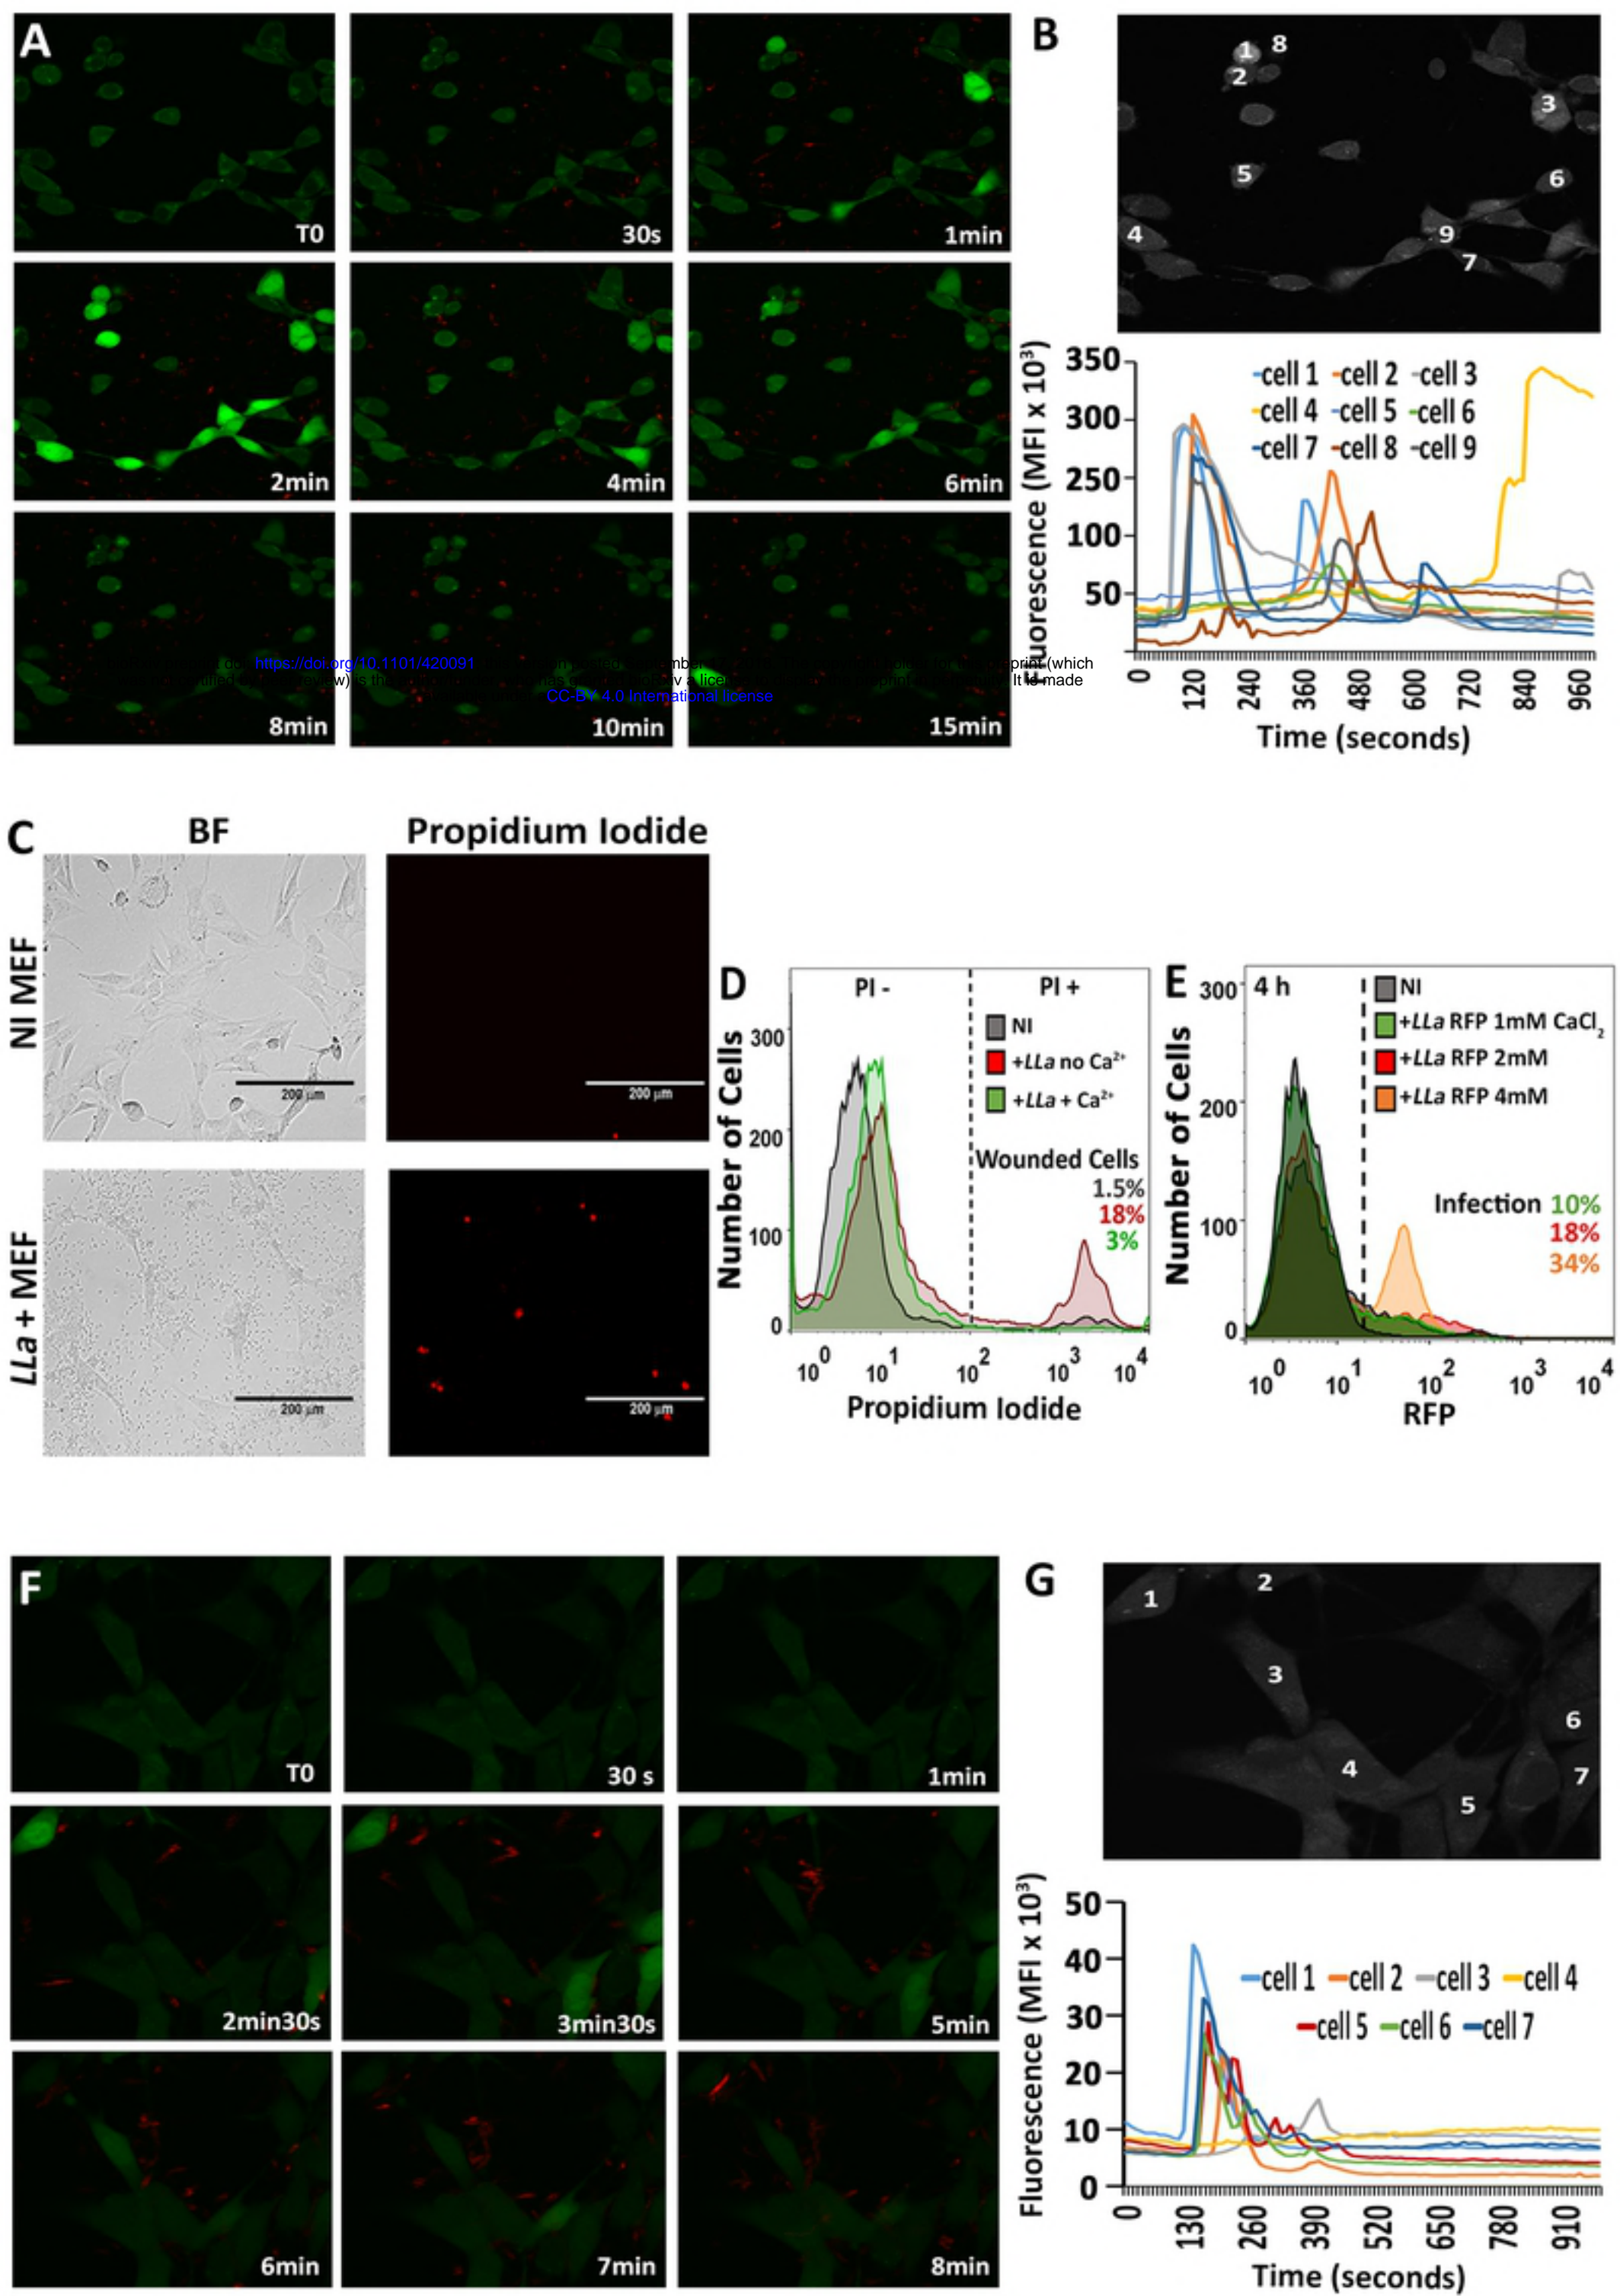



# FIGURE 4

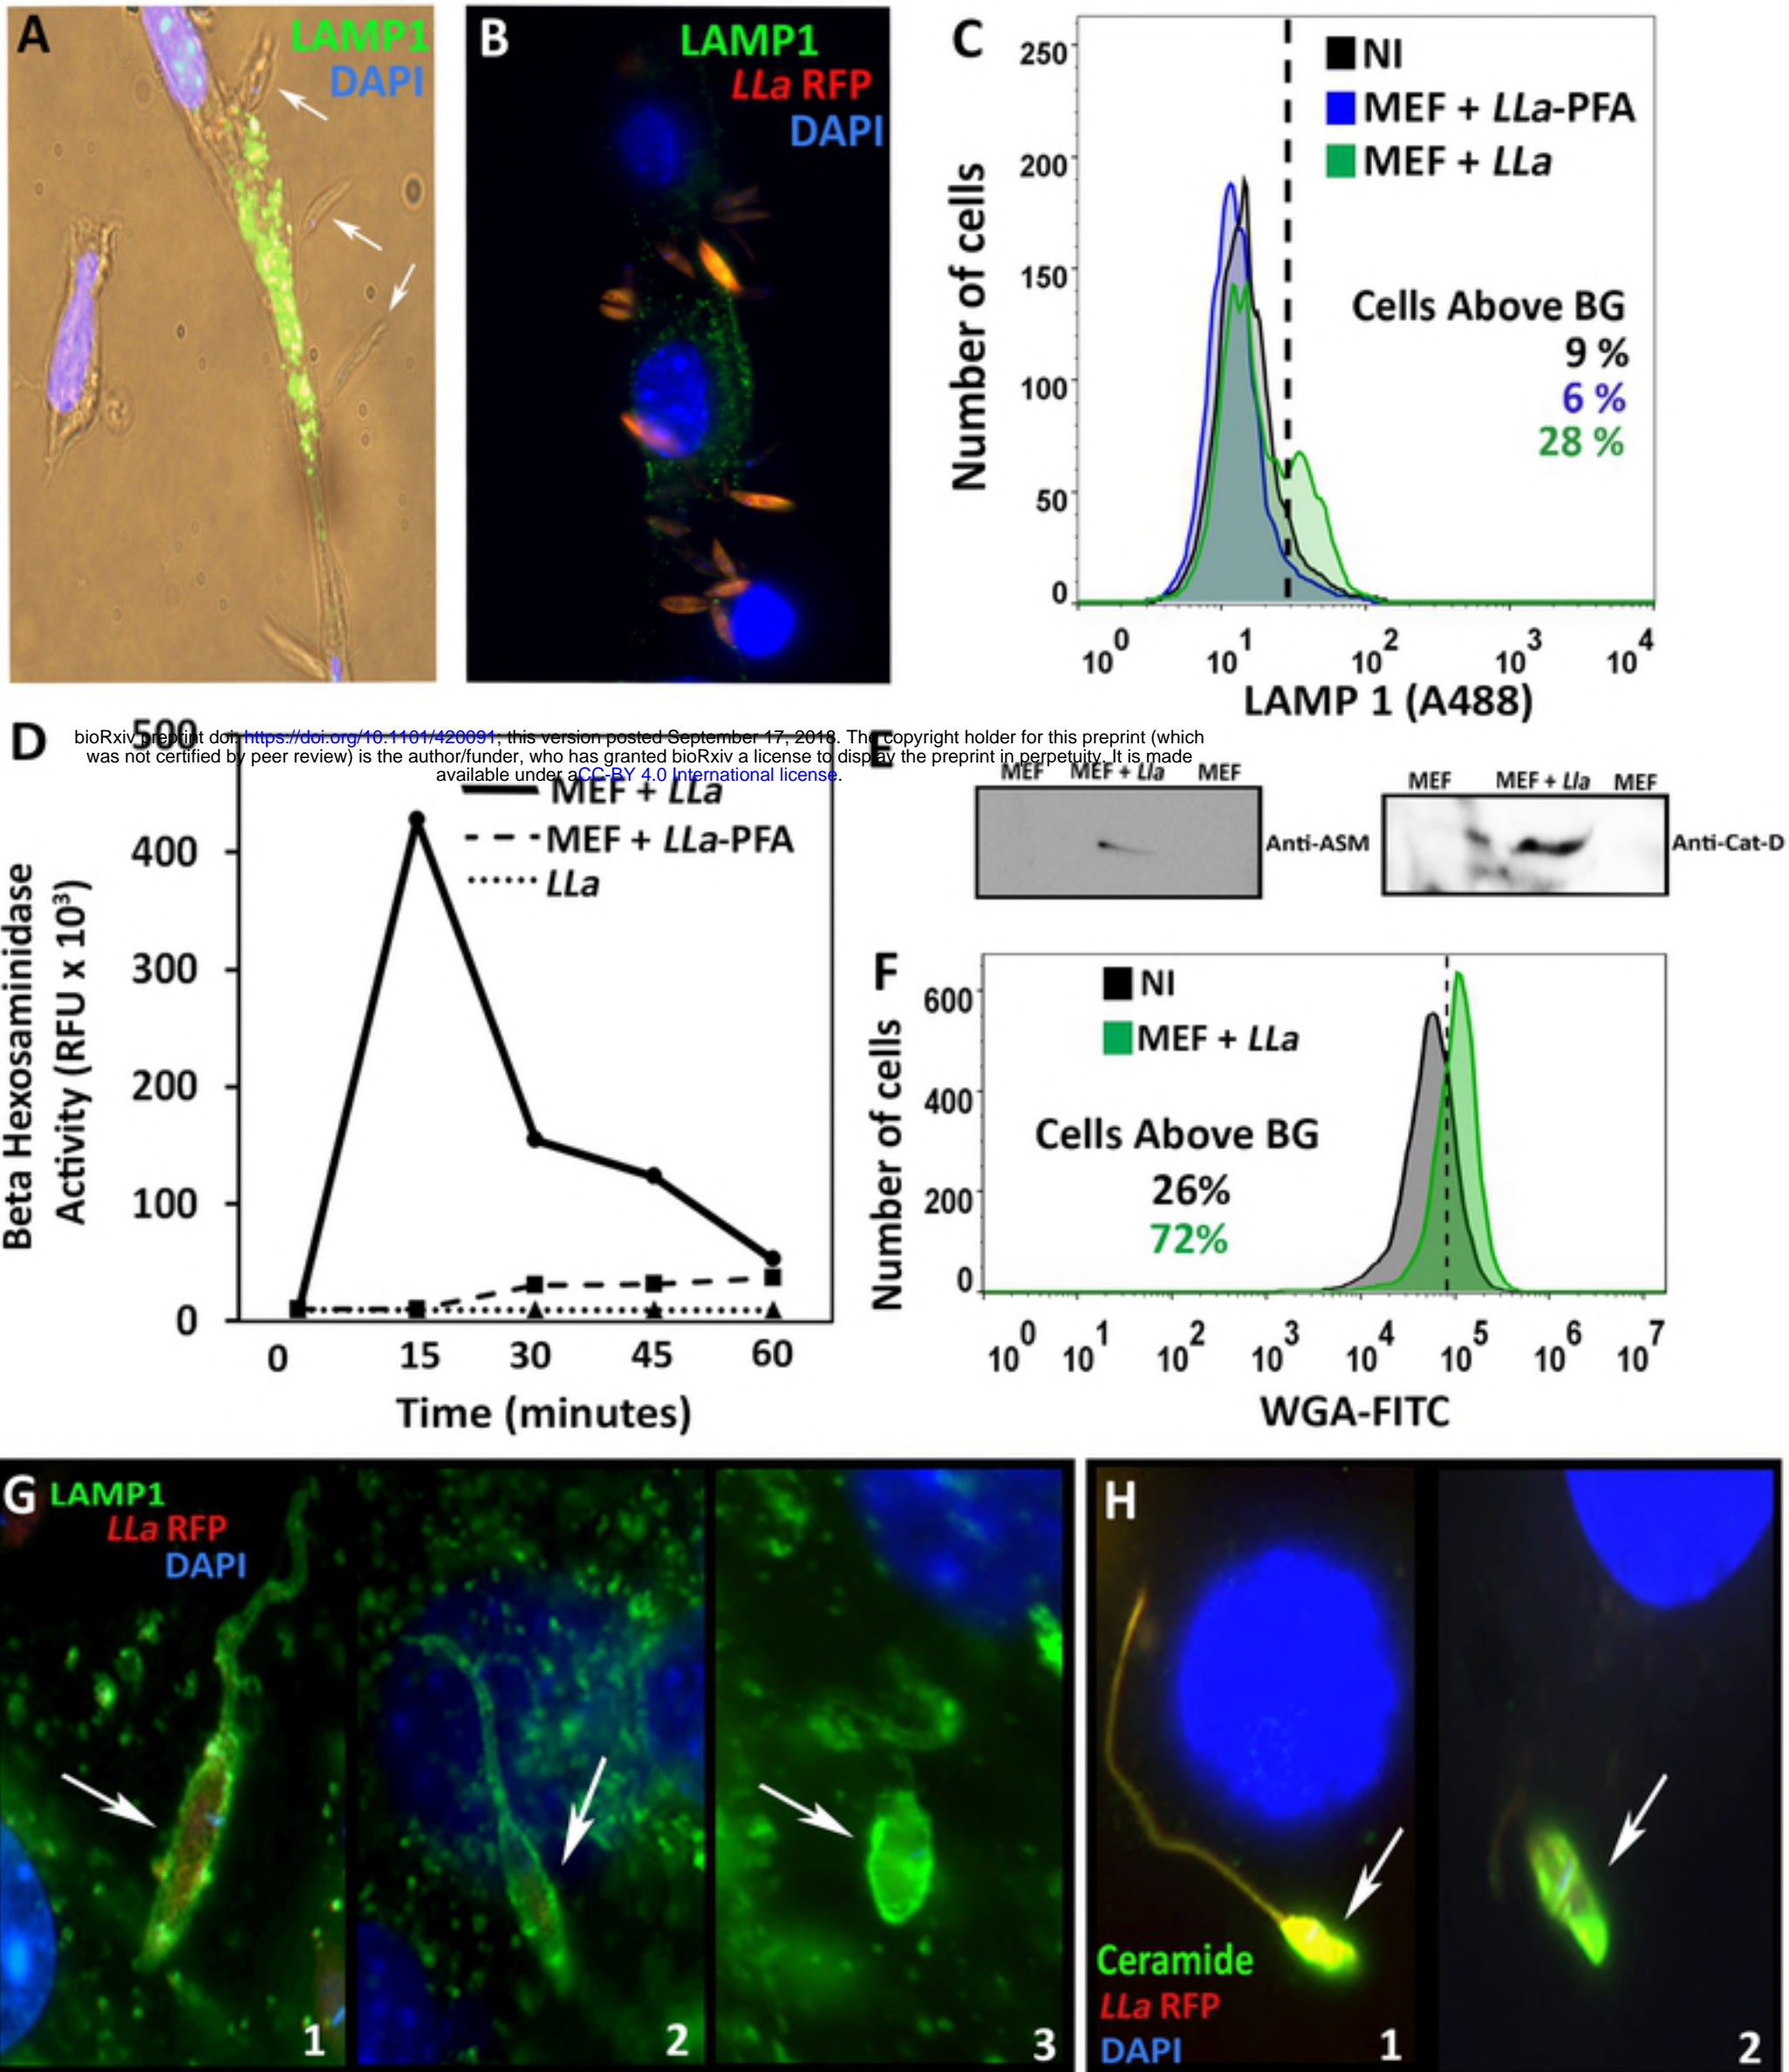

# FIGURE 5

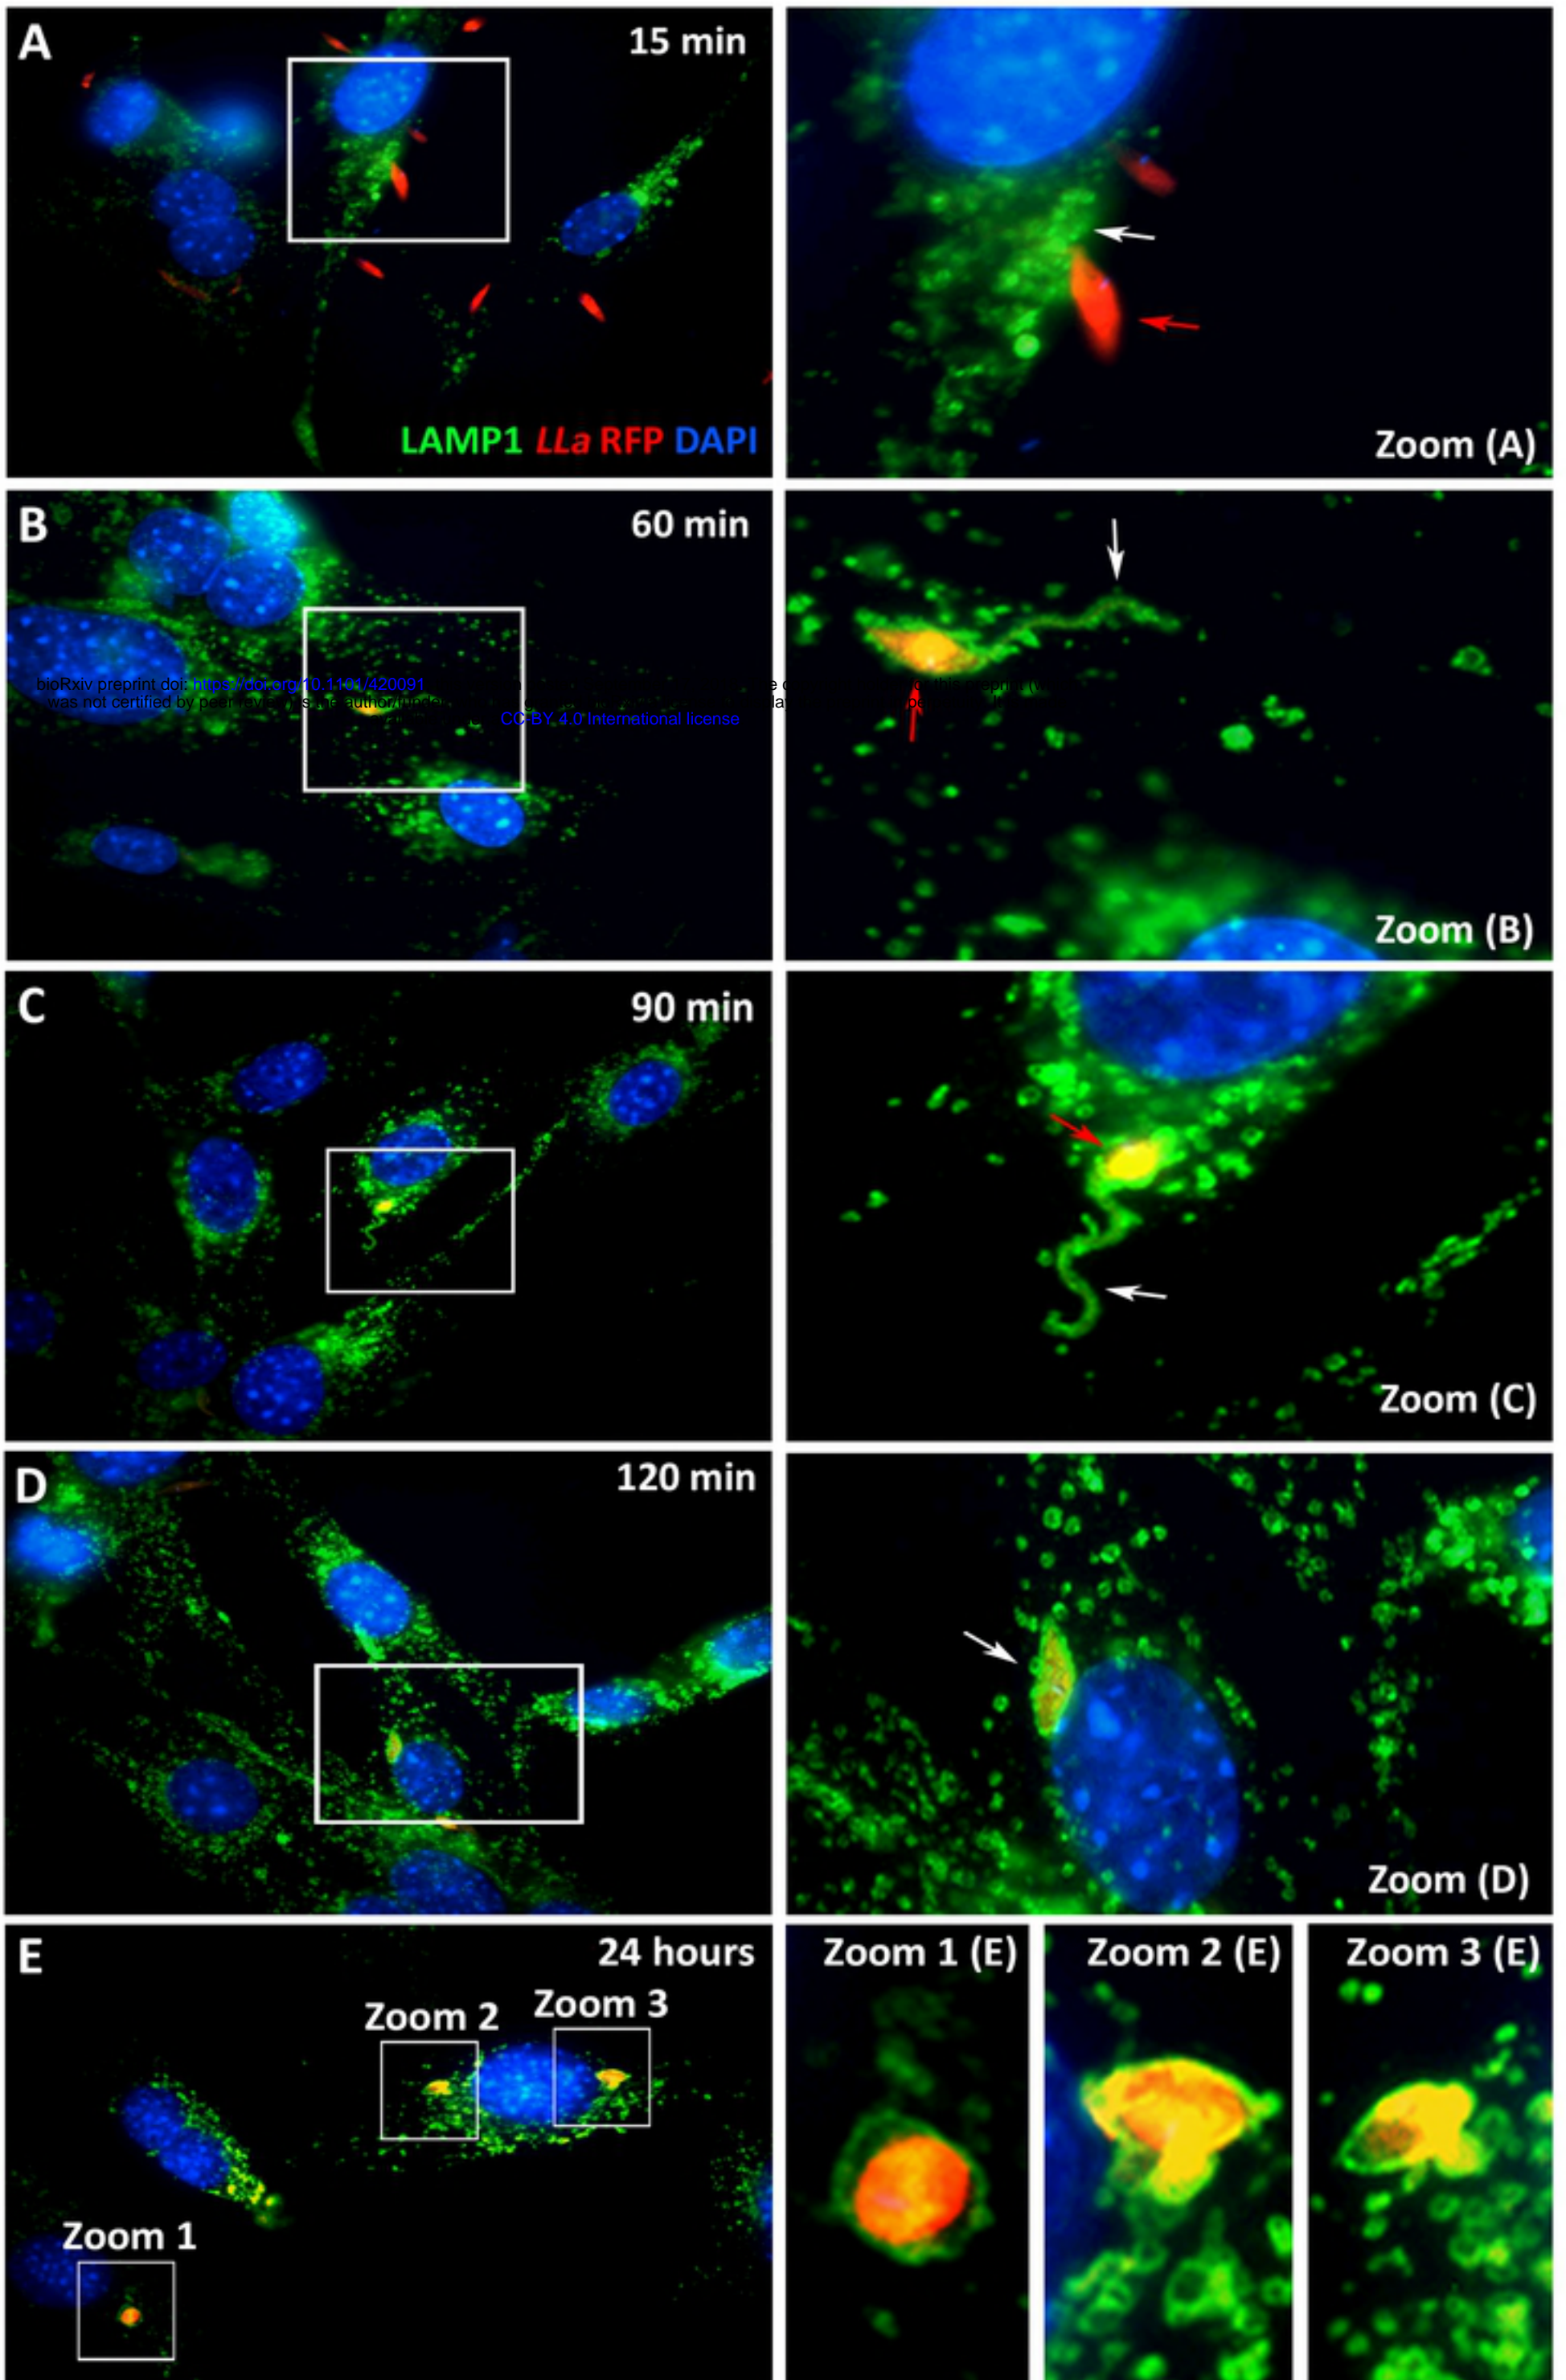

# FIGURE 6

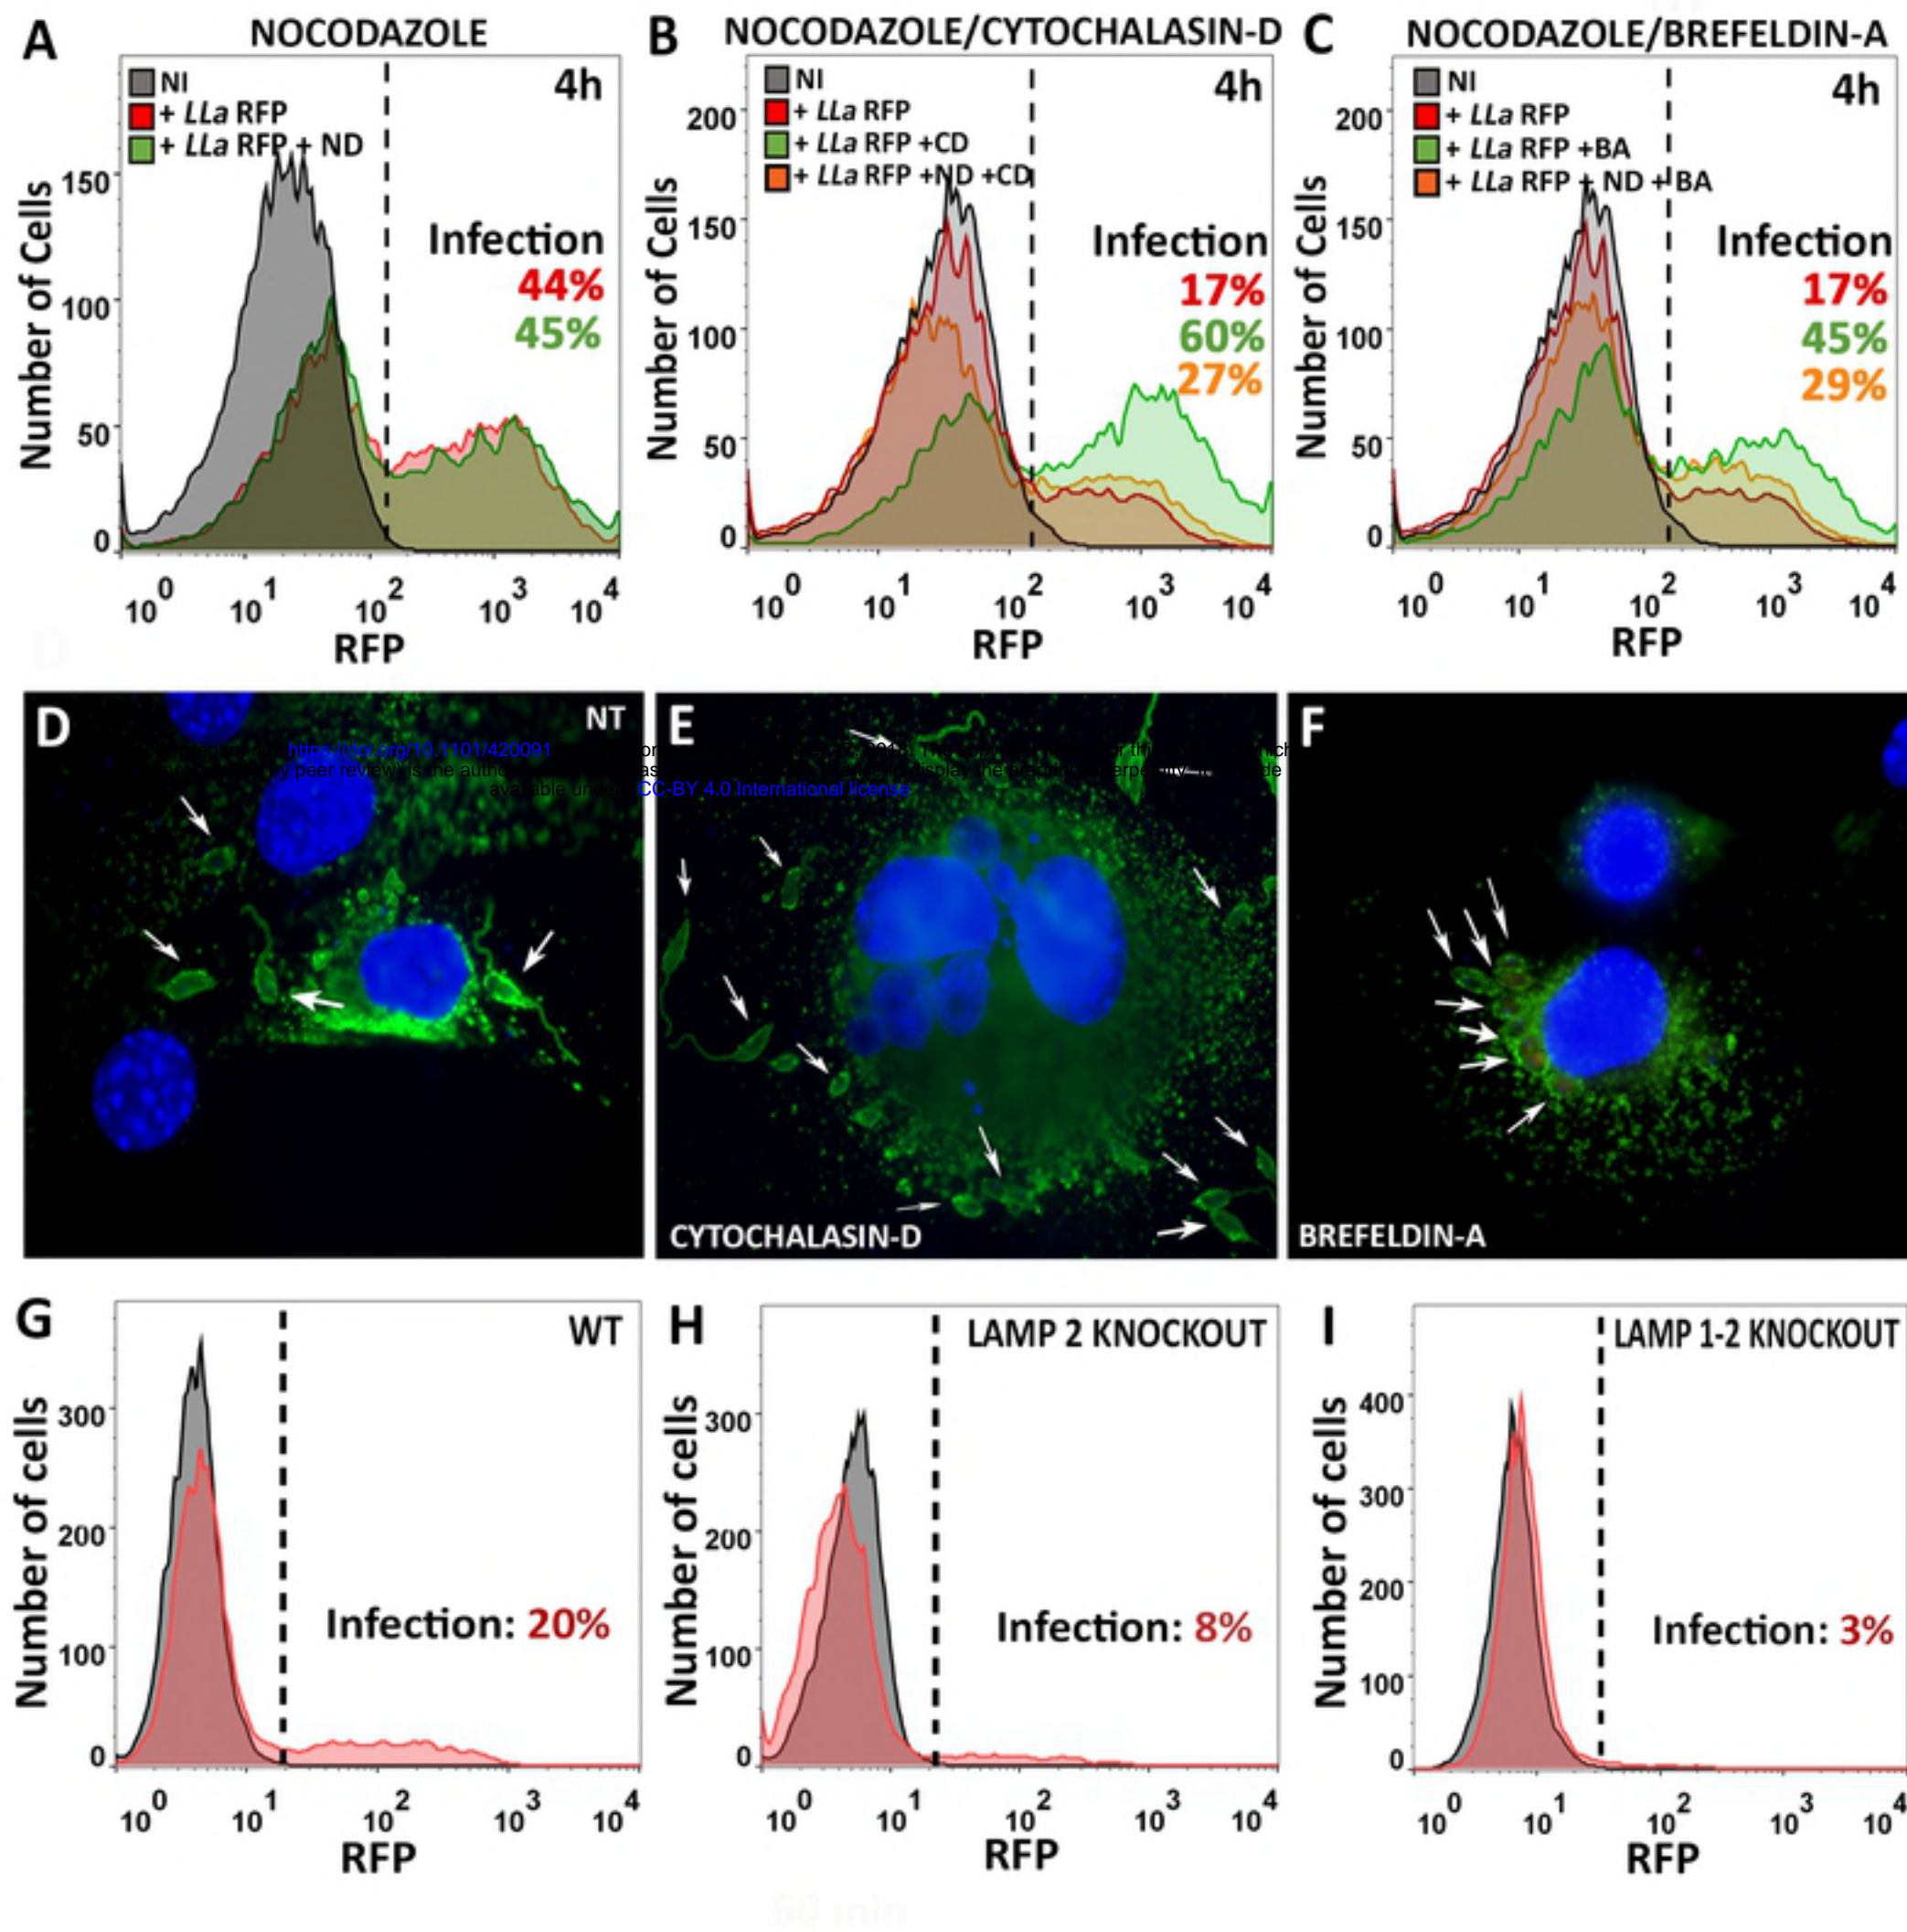

# FIGURE 7

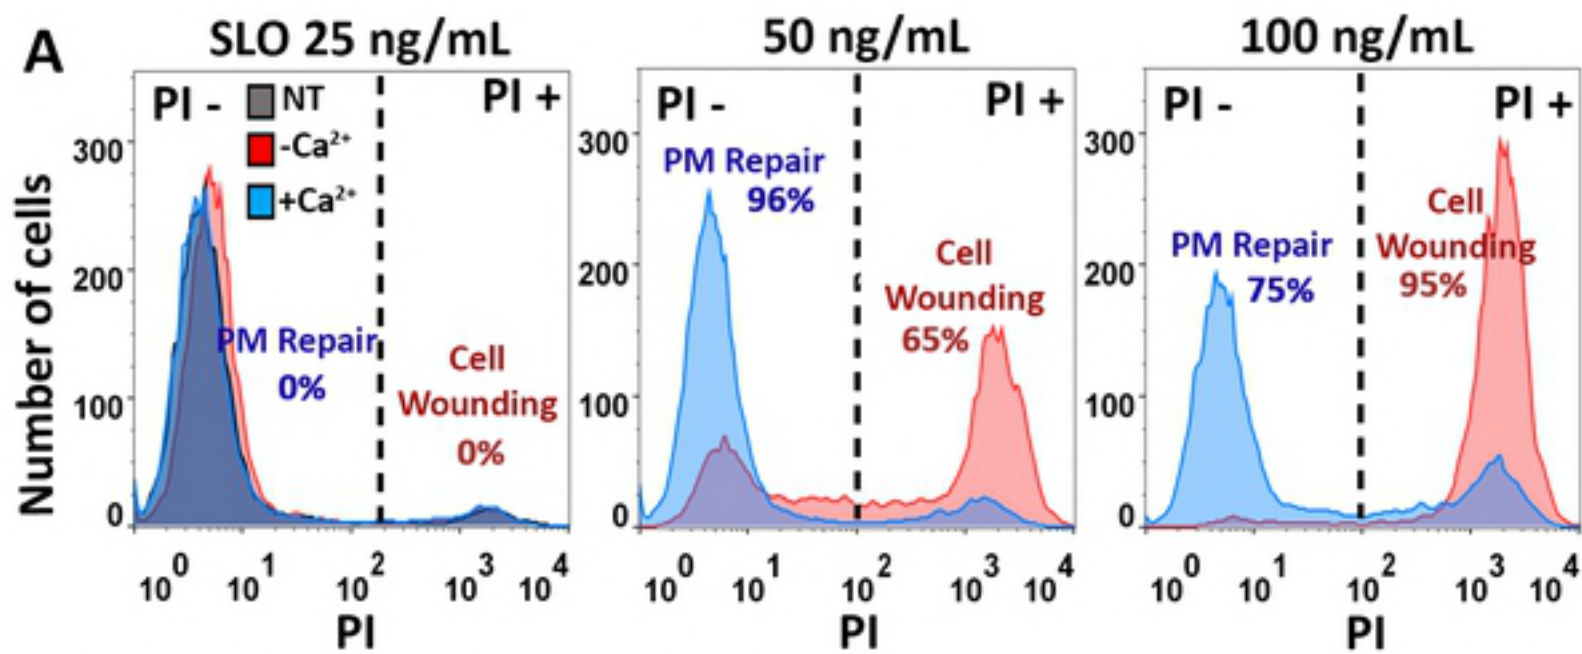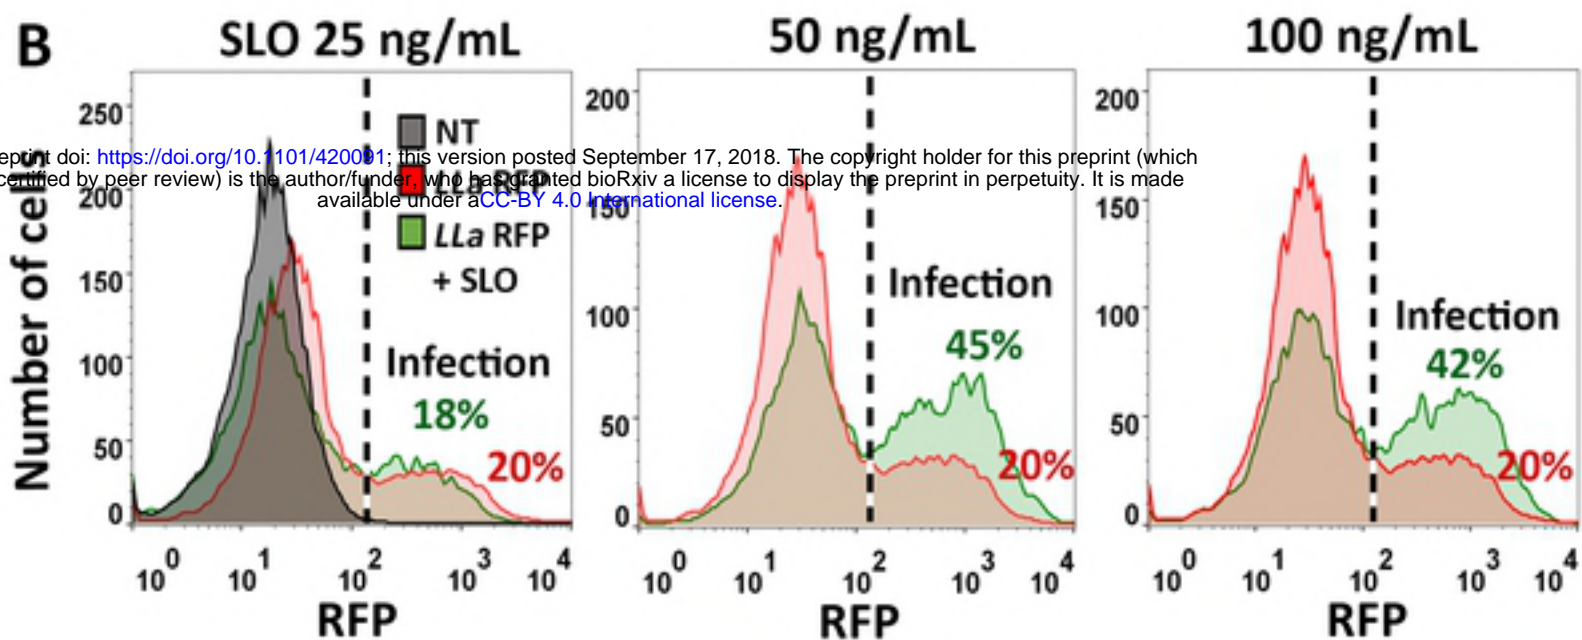

bioRxiv preprint doi: <https://doi.org/10.1101/420091>; this version posted September 17, 2018. The copyright holder for this preprint (which was not certified by peer review) is the author/funder, who has granted bioRxiv a license to display the preprint in perpetuity. It is made available under aCC-BY 4.0 International license.

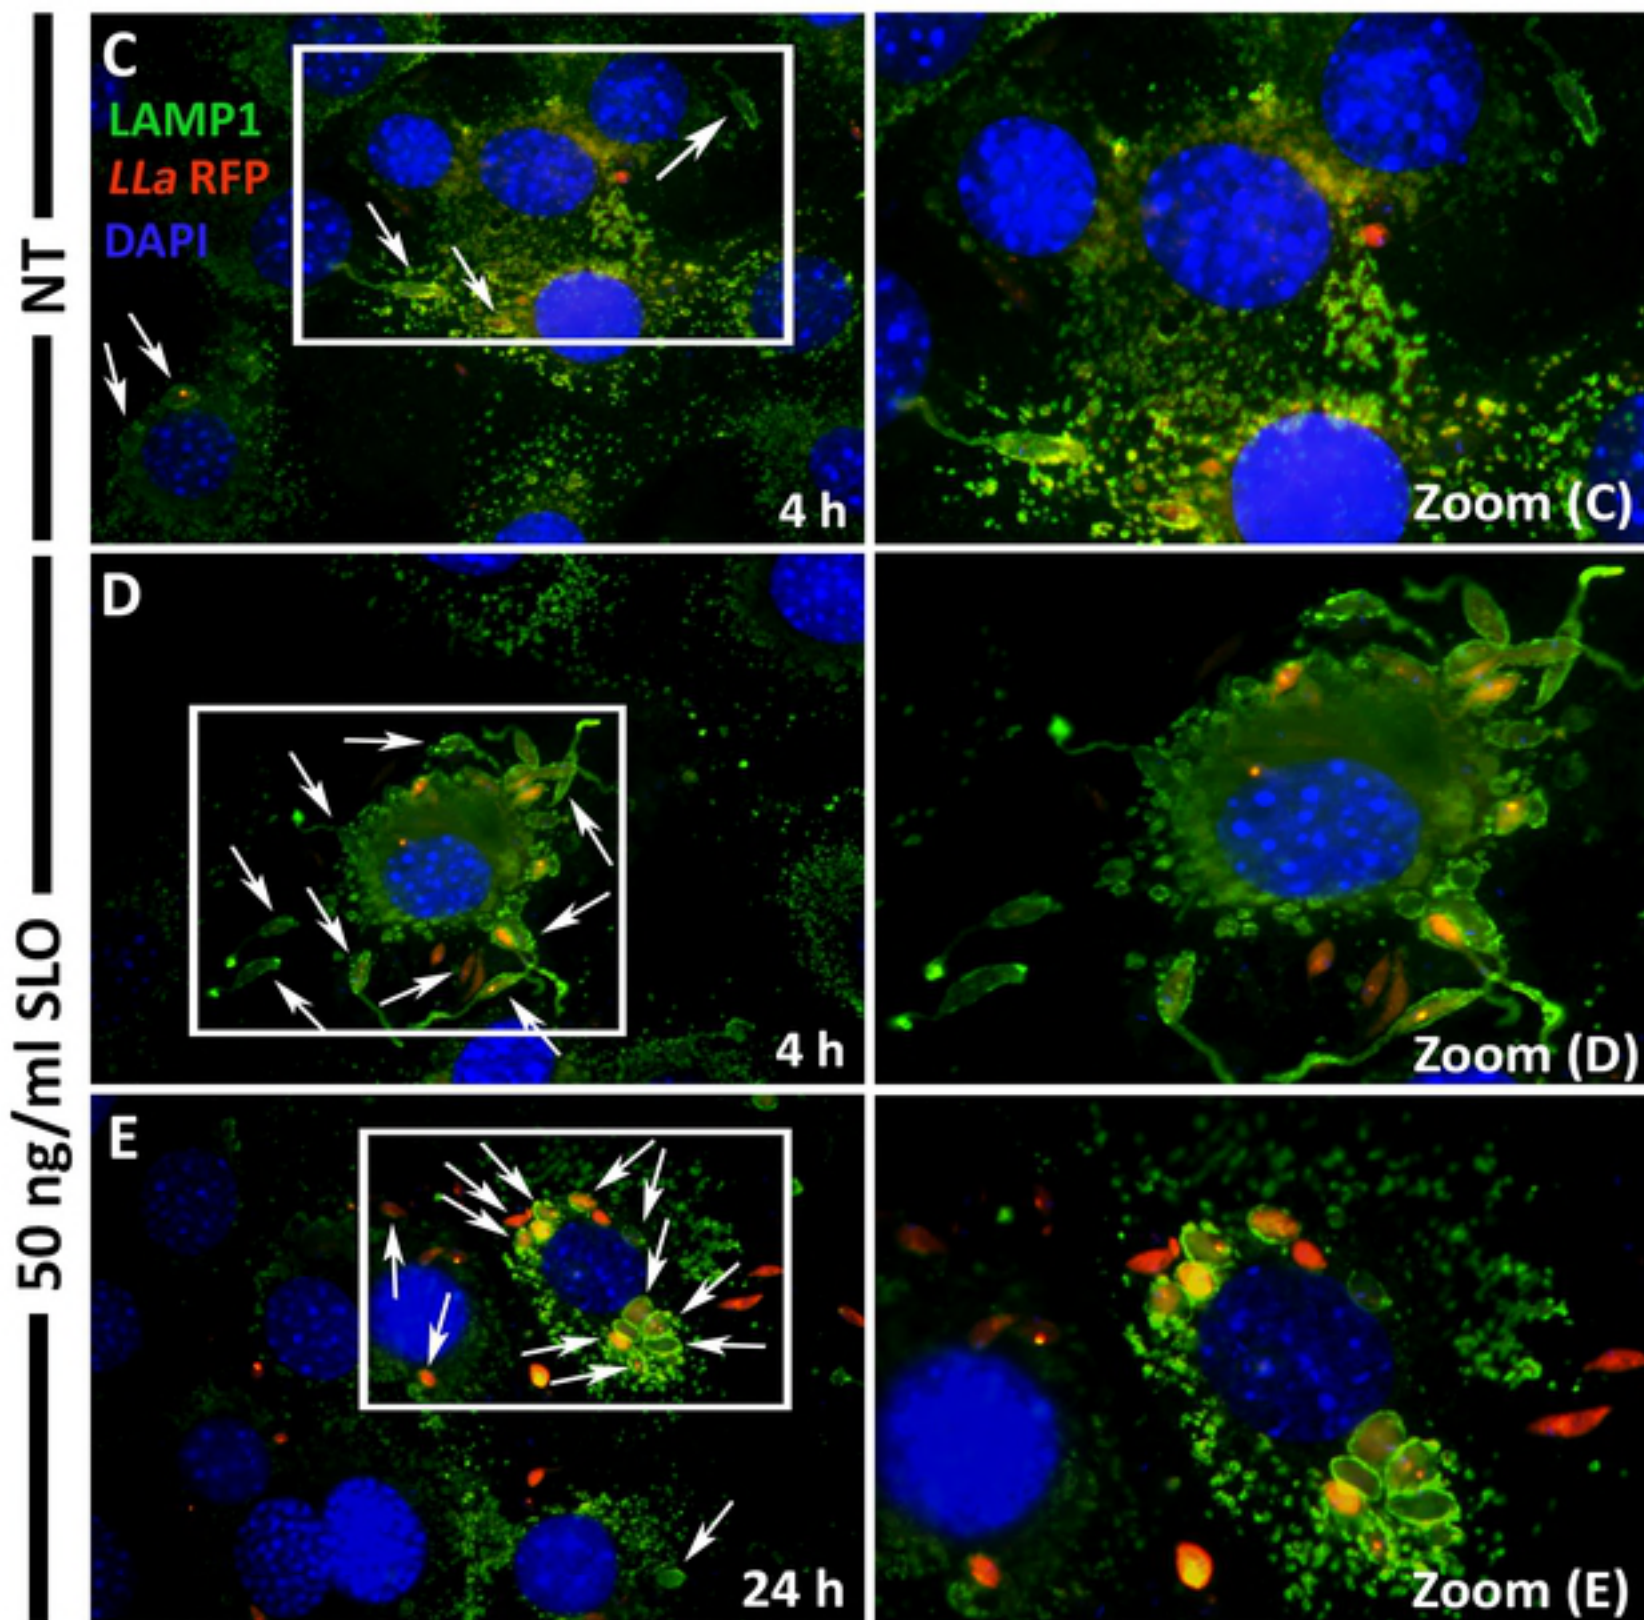

Source: https://www.biorxiv.org/content/biorxiv/early/2018/09/17/420091.full.pdf
